1 **Basal forebrain gating by somatostatin neurons drives cortical activity**

2

3 Nelson Espinosa, Alejandra Alonso, Cristian Morales, Pablo Fuentealba

4

5 Centro Interdisciplinario de Neurociencia UC, Departamento de Psiquiatria, Escuela de Medicina,  
6 Pontificia Universidad Catolica de Chile

7

8 **Abstract**

9 The basal forebrain provides modulatory input to the cortex regulating brain states and cognitive  
10 processing. Somatostatin-expressing cells constitute a local GABAergic source known to functionally  
11 inhibit the major cortically-projecting cell types. However, it remains unclear if somatostatin cells  
12 can regulate the basal forebrain's synaptic output and thus control cortical dynamics. Here, we  
13 demonstrate in mice that somatostatin neurons regulate the corticopetal synaptic output of the  
14 basal forebrain impinging on cortical activity and behavior. Optogenetic inactivation of somatostatin  
15 neurons in vivo increased spiking of some basal forebrain cells, rapidly enhancing and  
16 desynchronizing neural activity in the prefrontal cortex, inhibiting slow rhythms and increasing  
17 gamma oscillations. Locomotor activity was specifically increased in quiescent animals, but not in  
18 active mice. Altogether, we provide physiological and behavioral evidence indicating that  
19 somatostatin cells are pivotal in gating the synaptic output of the basal forebrain, thus indirectly  
20 controlling cortical operations via both cholinergic and non-cholinergic mechanisms.

21

## 1 Introduction

2 The mammalian basal forebrain is a collection of subcortical structures comprising the ventral  
3 pallidum, diagonal band of Broca, substantia innominata, medial septum and peripallidal region,  
4 which provides extensive axonal projections to the entire cerebral cortex (Jones, 2008, Zaborszky et  
5 al., 2012). Damage to the basal forebrain is of conspicuous relevance for several neurological  
6 disorders, including Alzheimer's disease, Parkinson's disease, schizophrenia, and drug abuse  
7 (Whitehouse et al., 1982, Conner et al., 2003, Smith et al., 2004). Under normal physiological  
8 conditions, the basal forebrain plays central roles in arousal, attention, motivation, memory,  
9 plasticity, sensory processing and sleep-wake cycles (Pinto et al., 2013, Lin et al., 2015, Xu et al.,  
10 2015). These actions are achieved by the complementary roles of a heterogeneous mixture of cell  
11 types that differ in neurotransmitter content, somato-dendritic morphology, axonal projections and  
12 spike timing (Brashear et al., 1986, Zaborszky and Duque, 2000, Jones, 2005).

13  
14 Despite representing a minor fraction of the basal forebrain neuronal population, cholinergic  
15 projection cells have been extensively studied and implicated in most of the abovementioned  
16 functions. Nonetheless, in recent years evidence has emerged on the functional significance of  
17 different non-cholinergic cells in the basal forebrain, which include neuronal populations expressing  
18 GABA, glutamate and neuropeptides (Duque et al., 2000, Zaborszky and Duque, 2000, Henny and  
19 Jones, 2008). Recent comprehensive circuit-mapping experiments have established the hierarchical  
20 organization of the basic synaptic circuit of sleep-wake cycle in the basal forebrain. Accordingly, the  
21 main three cortically projecting cell types are synaptically connected, with glutamatergic cells  
22 exciting cholinergic neurons, which in turn activate parvalbumin-expressing cells (Xu et al., 2015).  
23 The activation of this circuit exerts a prominent wake-promoting effect by desynchronization of  
24 cortical activity, a hallmark of wakeful and alert brain states enhancing cortical responsiveness and  
25 sensory encoding (Goard and Dan, 2009, Pinto et al., 2013, Xu et al., 2015). In particular, non-  
26 cholinergic glutamatergic neurons showed the strongest wake-promoting effect, consistent with  
27 their hierarchical position in the circuit. Conversely, optogenetic activation of basal forebrain  
28 somatostatin-expressing neurons rapidly increased the probability of slow wave sleep, with several  
29 of these neurons being strongly active during that brain state (Xu et al., 2015). Furthermore,  
30 somatostatin neurons in the basal forebrain actively inhibit all three major types of wake-promoting  
31 neurons. Thus, promotion of slow wave sleep seems to be based on the broad inhibition of multiple  
32 wake-promoting cell types in the basal forebrain local circuit.

33  
34 Optogenetic stimulation of somatostatin neurons in the basal forebrain with Channelrhodopsin-2  
35 has demonstrated that they are *sufficient* to promote deep sleep (Xu et al., 2015). However, it  
36 remains unknown if they are *necessary* to regulate cortical dynamics. Here, we address this issue  
37 through optogenetic inactivation of somatostatin neurons. We found that somatostatin neurons  
38 could control the corticopetal synaptic output of the basal forebrain affecting the intrinsic dynamics  
39 of cortical circuits in anesthetized and freely-moving mice. Selective inhibition of somatostatin  
40 neurons rapidly increased neural activity in a subset of basal forebrain cells, followed by enhanced  
41 recruitment of cortical cells and desynchronization of prefrontal cortex activity. These results  
42 suggest that somatostatin neurons are a key element in the control of the synaptic output of the  
43 basal forebrain and can thus affect the regulation of cortical states.

44

## 1 **Results**

### 2 **Synaptic output of the basal forebrain is regulated by somatostatin cells**

3 We first studied the significance of somatostatin cells for basal forebrain activity patterns. For this,  
4 we stereotaxically implanted an optrode in the basal forebrain of anesthetized transgenic animals  
5 (Fig. 1A) selectively expressing halorhodopsin in somatostatin cells (NpHR+, supplementary figure 1).  
6 We delivered prolonged laser pulses to achieve maximal inhibition of somatostatin cells and  
7 reproduce previous experimental protocols (Goard and Dan, 2009, Pinto et al., 2013, Kim et al.,  
8 2016). We found a minor fraction of basal forebrain cells (8.8%,  $n = 29$  units) responding (time  
9 constant =  $263.1 \pm 48.7$  ms) by robustly decreasing their activity ( $49.2 \pm 5.1\%$ ). Along with these  
10 putative somatostatin cells decreasing their firing rate, another neuronal population (17%,  $n = 56$   
11 units) increased its activity ( $39.6 \pm 7.9\%$ ), presumably by synaptic disinhibition, with significantly  
12 slower kinetics (time constant =  $602.5 \pm 68.6$  ms) (Fig. 1C, E). Spontaneous firing rates of neurons  
13 activated by optical stimulation were consistently higher than those of inhibited or unresponsive  
14 cells (Fig. 1D), suggesting that they might belong to different cell classes (Lee et al., 2005, Hassani et  
15 al., 2009). Thus, optical inactivation of somatostatin neurons was rapidly followed by the activation  
16 of a subset of basal forebrain cells.

17  
18 We then combined somatosensory stimulation with optical inhibition of somatostatin cells in order  
19 to physiologically characterize response patterns in the basal forebrain. We found neuronal patterns  
20 consistent with different cell types being engaged by optical stimulation (supplementary figure 2).  
21 Previous studies have shown that only a subset of non-cholinergic cells is inhibited during  
22 somatosensory stimulation by tail pinching (Hassani et al., 2009). Similarly, we found a group of cells  
23 inactivated by somatosensory stimulation, which exhibited diverse responses to optical stimulation,  
24 suggesting functional diversity among them. Indeed, putative non-cholinergic cells were excited,  
25 inhibited or unaffected by optical stimulation. It has also been documented that cholinergic cells  
26 display low levels of activity during slow oscillations and are strongly activated during somatosensory  
27 stimulation (Lee et al., 2005, Hassani et al., 2009). We found units consistent with such activity  
28 patterns that were also disinhibited by the inactivation of somatostatin cells, thus suggesting that  
29 some cholinergic cells were also recruited by optical stimulation. Finally, somatostatin cells exhibited  
30 diverse response patterns to somatosensory stimulation, consistent with the diverse firing patterns  
31 described across the sleep-wake cycle (Xu et al., 2015). Overall, our results suggest that decreasing  
32 the GABAergic input provided by somatostatin neurons in the basal forebrain modifies the balance  
33 in network activity engaging diverse neuronal populations, likely comprising cholinergic and non-  
34 cholinergic cortically projecting cells.

35

### 36 **Optogenetic disinhibition of the basal forebrain drives cortical dynamics**

37 Next, we assessed the effect of the basal forebrain's synaptic output onto cortical neurons. Hence,  
38 we implanted an optic fiber in the basal forebrain and simultaneously recorded neural activity in the  
39 medial prefrontal cortex (mPFC, Fig. 2A). Optogenetic inhibition of somatostatin cells in the basal  
40 forebrain reliably increased mPFC spiking activity (Fig. 2B, C). Nearly one third of cortical neurons  
41 (29.6%,  $n = 387$ ) systematically increased their firing rate (by  $30.4 \pm 1.2\%$ ) for the entire duration of  
42 the laser pulse, producing a prominent effect on cortical activity (Fig. 2C). Enhanced discharge  
43 probability was slightly higher in infralimbic cortex as compared with prelimbic cortex  
44 (supplementary figure 3), consistent with differential connectivity patterns provided by corticopetal  
45 basal forebrain projections (Henny and Jones, 2008). The excitatory effect was dependent on laser

1 power, and specific for transgenic NpHR+ animals (Fig. 2C, D; supplementary figure 4). Moreover,  
2 optogenetic stimulation of transgenic NpHR+ animals was only effective in evoking cortical  
3 activation, when the optic fibre was accurately positioned in the basal forebrain, and not in other  
4 brain regions (supplementary figure 5). Thus, the effect of cortical activation was specific for  
5 optogenetic disinhibition of the basal forebrain. Laser induced cortical activation also caused a  
6 marked reduction of neural synchrony measured by the coherence between individual neurons (i.e.,  
7 single units) and the other simultaneously recorded cells (i.e., multiunits), in particular for activity in  
8 the low frequency range ( $< 10$  Hz, Fig. 2E). Previous studies have shown that enhanced and  
9 decorrelated cortical activity can be attributed to the activation of basal forebrain cholinergic pathways  
10 innervating the cortex (Goard and Dan, 2009, Pinto et al., 2013). In order to confirm that cholinergic  
11 projection neurons mediated laser induced cortical activation in our experimental conditions, we  
12 locally applied cholinergic receptor antagonists in the medial prefrontal cortex. Cholinergic blockers  
13 significantly diminished cortical activation (from  $35.7 \pm 3.2$  % (before drug), to  $19.0 \pm 3.7$  % (after  
14 drug);  $W = 1438$ ,  $p < 10^{-6}$ , Wilcoxon signed rank test,  $n = 64$  cells, 3 mice), confirming that at least  
15 part of the effect of basal forebrain activation was mediated by enhanced cholinergic transmission  
16 to the cortex. Importantly, baseline spiking activity in the cortex was not affected by cholinergic  
17 receptor antagonists. On the other hand, optical stimulation produced a significant increase in  
18 discharge probability at all intervals (Friedman test,  $p = 1.07 \times 10^{-18}$ ). Nevertheless, the effect of  
19 optical stimulation progressively decreased after local drug application (Wilcoxon signed rank test,  $p$   
20  $= 2.6 \times 10^{-4}$ ). In order to confirm that cholinergic projection neurons mediated laser induced cortical  
21 activation, we locally applied cholinergic receptor antagonists in the medial prefrontal cortex.  
22 Cholinergic blockers significantly diminished cortical activation (from  $35.7 \pm 3.2\%$ , before drug; to  
23  $19.0 \pm 3.7\%$ , after drug), confirming that at least part of the effect of basal forebrain activation was  
24 mediated by enhanced cholinergic transmission to the cortex (supplementary figure 5).

25  
26 The multielectrode probe used in our experiments allowed us to simultaneously sample neural  
27 activity from different cortical layers (supplementary figure 6). We found that superficial layers  
28 contained a tiny fraction of the recorded cells, with the large majority of active cells (79.8 %) being  
29 located in deeper layers. Interestingly, despite large differences in the total numbers of cells by  
30 layer, similar proportions were activated at all depths. We next tested if optical stimulation of the  
31 basal forebrain exerted differential effects according to cortical cell type (supplementary figure 6).  
32 For this, we sorted units according to spike duration. A histogram of spike durations for all recorded  
33 units showed a bimodal distribution, with fast-spiking cells (i.e., spike duration  $< 0.6$  ms), putative  
34 GABAergic interneurons (McCormick et al., 1985), accounting for a small fraction of the total  
35 neuronal population (9.9 %). Fast-spiking cells discharged at significantly higher rates (unpaired t-  
36 test,  $p = 3.9 \times 10^{-36}$ ,  $5.16 \pm 0.39$  Hz) than regular-spiking cells, (i.e., spike duration  $> 0.6$  ms,  $2.5 \pm 0.05$   
37 Hz), putative pyramidal cells (McCormick et al., 1985). Optical stimulation of the basal forebrain  
38 activated similar proportions of putative interneurons and pyramidal cells. However, the increase in  
39 discharge probability produced by laser stimulation was significantly higher on interneurons ( $35.5 \pm$   
40  $5.9$  %) than on pyramidal cells ( $26.2 \pm 1.0$  %; unpaired t-test,  $p = 0.019$ ). Hence, the cell type-specific  
41 increase in discharge probability produced by laser stimulation suggests differential dynamics of  
42 neuronal activation by cell type in the cortex upon basal forebrain excitatory drive.

43

44 **Optogenetic stimulation of the basal forebrain reorganizes cortical oscillatory patterns**

1 We sought to establish if the prominent effect in cortical spiking during basal forebrain stimulation  
2 was correlated with specific changes in network activity patterns in the cortex. Our recordings were  
3 performed in the context of anesthesia-induced slow oscillations, which resemble slow waves  
4 occurring during natural deep sleep and powerfully phase-modulate neuronal activity across the  
5 entire cortical mantle (Steriade et al., 1993a, Steriade, 2006). We normalized the LFP signal and  
6 plotted the distribution of baseline slow oscillation epochs in reference to laser stimulation (Fig. 3A,  
7 B). Hence, we found that slow oscillatory episodes distributed in two clusters (Fig. 3B), from which,  
8 only one cluster was affected by optical stimulation in the basal forebrain (Fig. 3C, D). That is, only  
9 very slow frequency, high power oscillations were suppressed by optogenetic stimulation. We then  
10 studied if slow oscillatory cortical activity was able to bias the effect of the input provided by the  
11 basal forebrain. We found that the effect of optogenetic stimulation on cortical activity was phase-  
12 modulated by slow oscillations (supplementary figure 7). Although basal forebrain disinhibition was  
13 able to enhance cortical activity in all phases of the slow oscillation, the effect was maximal during  
14 the active phase of slow oscillations and minimal at the peak of slow oscillation cycles,  
15 corresponding to the silent phase of the rhythm (supplementary figure 7). Furthermore, the  
16 influence of basal forebrain on cortical spiking did not extend for the whole duration of the light  
17 pulse (supplementary figure 7). Instead, optogenetic stimulation of the basal forebrain was phase  
18 modulated by the slow oscillation only during the second half of the laser pulse (i.e., 3-5 s,  
19 supplementary figure 7). These results suggest that the impact of basal forebrain output on cortical  
20 activity strongly depends on the ongoing cortical state.

21  
22 In addition, we analyzed cortical gamma band activity, a prominent marker of cortical activation  
23 (Sohal et al., 2009), which seems to rely on the activity of basal forebrain parvalbumin-expressing  
24 cells, rather than depend on cholinergic neurons (Kim et al., 2015). Hence, we quantified the spectral  
25 distribution of cortical activity and found a prominent shoulder in the low gamma range (20-40 Hz,  
26 Fig. 3E), which power was significantly more elevated during optical stimulation when compared to  
27 control periods (Wilcoxon signed rank test,  $p = 0.0226$ , Fig. 3G). This result was specific for the low  
28 gamma band, as it was not detected in the high gamma band (55-80 Hz, supplementary figure 8). In  
29 addition, we also computed the density of gamma oscillatory episodes (Sirota et al., 2008, Le Van  
30 Quyen et al., 2010, Valderrama et al., 2012). Accordingly, we analytically extracted gamma band  
31 episodes from the gamma band activity. We found that the density of oscillatory episodes  
32 significantly increased (t-test,  $p = 5.8 \times 10^{-8}$ ) only in the low gamma band during optical stimulation  
33 (Fig. 3H), but was not affected in the high gamma band (supplementary figure 8). Neither the  
34 amplitude nor the duration of gamma episodes was dependent on the intensity of optical  
35 stimulation. Indeed, basal forebrain optogenetic stimulation was adjusted to low (10 mW) or high  
36 (15 – 25 mW) laser power values. Only the mean frequency was marginally, yet significantly  
37 increased for slow gamma events (supplementary figure 8). Other parameters of gamma band  
38 episodes were not affected by optical stimulation of the basal forebrain (supplementary table 1,  
39 supplementary figure 8). Overall, these results support an active role for basal forebrain  
40 somatostatin cells in the regulation of cortical oscillatory activity, including slow waves and gamma  
41 band oscillations.

42

#### 43 **Locomotor activity is triggered by basal forebrain disinhibition during resting states**

44 Finally, we assessed the role of basal forebrain somatostatin cells in spontaneous behavioral  
45 patterns. For this, we tracked by video recording locomotor activity of freely-moving mice bilaterally

1 implanted with optic fibers targeting the basal forebrain (supplementary figure 9, supplementary  
2 movies 1-3). Animals were placed in an open field and allowed to explore freely the environment.  
3 Once mice stopped exploration and became quiescent, we started optogenetic stimulation to the  
4 basal forebrain (Fig. 4A, B). Locomotor responses to laser stimulation of double transgenic NpHR+  
5 animals were larger and faster than responses of control NpHR- animals (Fig. 4C). Locomotor  
6 responses were only different between NpHR+ and NpHR- animals when the initial state was  
7 quiescent (i.e.; not moving). Indeed, when animals were already moving, optogenetic inactivation of  
8 basal forebrain somatostatin cells produced no significant differences in locomotor displacements  
9 (supplementary figure 10). Furthermore, in order to discard nonspecific effects due to sensory  
10 detection of laser light, we repeated optogenetic stimulation in transgenic NpHR+ animals, but  
11 physically blocked the light path between ferrules (Fig. 4A). In doing so, we found that optogenetic  
12 stimulation was only effective in triggering movement when light was allowed to pass through the  
13 optic fiber to the basal brain (Fig. 4C). Under those conditions, responses were faster and larger.  
14 Thus, optogenetic inactivation of basal forebrain somatostatin neurons selectively elicits locomotor  
15 activity in quiescent animals, likely due to general cortical activation and increased arousal.  
16



## 1 **Discussion**

2 We have shown that optogenetic inhibition of somatostatin cells in the basal forebrain is sufficient  
3 to locally modify the balance of synaptic activity and spiking patterns of some neuronal populations,  
4 therefore enhancing cortical activity and arousal. Such effect takes place rapidly (sub-second time  
5 scale) and likely involves the disinhibition of cholinergic and non-cholinergic pathways. Thus,  
6 somatostatin cells can exert a regulatory role on the synaptic output on the basal forebrain and  
7 indirectly control cortical processing and behavioral patterns.

8

## 9 **Optogenetic inactivation of somatostatin cells boosts the corticopetal synaptic output of the basal** 10 **forebrain**

11 Inhibition of neural spiking in somatostatin cells was rapidly followed by increased excitation of  
12 other neuronal populations, likely due to synaptic disinhibition (Ikeda and Wright, 1972). Given the  
13 fact that somatostatin cells provide functional inhibitory input to glutamatergic cells, cholinergic  
14 cells, and parvalbumin cells (Zaborszky and Duque, 2000, Xu et al., 2015), we believe that all these  
15 cell types might elevate their activity upon optogenetic inhibition of somatostatin cells. Interestingly,  
16 our data show that basal forebrain cells activated during laser stimulation had the highest baseline  
17 firing rates. Previous studies have shown that identified cholinergic cells exhibit low activity levels  
18 during slow wave sleep (Jones, 2005, Lee et al., 2005) and anesthesia-induced slow oscillations  
19 (Jones, 2005, Hassani et al., 2009). Accordingly, a significant proportion of our recorded units are  
20 likely to be cholinergic cells that were engaged during optical silencing of somatostatin cells. In  
21 addition, the local application of cholinergic receptor antagonists in the cortex confirmed that basal  
22 forebrain cholinergic cells were partially responsible for the laser induced effect of cortical  
23 activation. Taken together, this evidence suggests that inactivation of somatostatin cells is likely to  
24 recruit both cholinergic and non-cholinergic neurons in the basal forebrain.

25

## 26 **Enhancement and desynchronization of prefrontal cortex activity driven by the basal forebrain**

27 Our results suggest that the synaptic drive provided by basal forebrain neurons disinhibited by  
28 optogenetic stimulation was powerful enough as to modify cortical activity patterns. The action of  
29 basal forebrain neurons on cortical dynamics is long known (Lin et al., 2015) and has been mostly  
30 attributed to cholinergic cells, despite the fact that they account for only a small fraction of basal  
31 forebrain neurons (Hedreen et al., 1984, Zaborszky et al., 2012). Our application of cholinergic  
32 receptor antagonists significantly reduced laser induced cortical activation, confirming that effects  
33 were partially mediated by cholinergic transmission. Enhanced neuronal discharge in the cortex  
34 during cholinergic activation has been reported in previous studies in vivo (Disney et al., 2007, Thiele  
35 et al., 2012, Pinto et al., 2013). Since we found little neuronal inhibition in the cortex during basal  
36 forebrain optical stimulation, our results suggest that the global effect of cholinergic transmission in  
37 the cortex might be shifting the balance of network activity to net excitation, with increased  
38 neuronal spiking. On the other hand, the decorrelation of cortical activity might be a general effect  
39 of cholinergic transmission in the cortex. Several observations support this idea. Indeed, during  
40 active whisking in mice, cholinergic fibers from the basal forebrain are robustly activated inducing  
41 transitions in cortical dynamics and brain state (Eggermann et al., 2014, Lin et al., 2015). Similarly, in  
42 the visual cortex, electrical stimulation of basal forebrain or optogenetic activation of cholinergic  
43 cells produces a marked decorrelation of neuronal spiking, which is associated with increased  
44 cognitive performance and enhanced sensory coding (Goard and Dan, 2009, Pinto et al., 2013).  
45 Finally, specific cholinergic lesions in the medial prefrontal cortex of monkeys have demonstrated

1 the importance of basal forebrain cholinergic innervation for working memory (Croxon et al., 2011).  
2 Thus, we propose that enhanced neuronal discharge in the prefrontal cortex, characteristic of delay  
3 periods in working memory tasks (Fuster and Alexander, 1971, Kubota and Niki, 1971, Goldman-  
4 Rakic, 1990) is probably supported by fast cholinergic transmission. Moreover, we predict that  
5 neuronal spiking will exhibit reduced correlation within neighboring neurons selectively during delay  
6 periods. Future experiments will have to be designed to test these predictions.

7

#### 8 **Alterations of network oscillations during cortical activation**

9 Cortical slow oscillations occur during slow-wave sleep and deep anesthesia states, affecting large  
10 neuronal populations across the brain (Massimini et al., 2004). This rhythm is dichotomously  
11 organized into active and silent periods (Steriade et al., 1993b). During active periods (also called UP  
12 states (Sanchez-Vives and McCormick, 2000)) depolarized membrane potentials and elevated  
13 neuronal spiking predominate in cortical circuits; whereas during silent periods (also known as  
14 DOWN states (Sanchez-Vives and McCormick, 2000)) low synaptic activity and hyperpolarized  
15 membrane potential are largely synchronized (Steriade et al., 1993b, Sanchez-Vives and McCormick,  
16 2000). Importantly, synaptic responsiveness (Timofeev et al., 1996) and sensory transmission (Azouz  
17 and Gray, 1999, Reig and Sanchez-Vives, 2007, Rigas and Castro-Alamancos, 2009) are differentially  
18 phase-modulated by the slow oscillation. However, results reported vary depending upon cortical  
19 areas studied and experimental protocols used. Accordingly, some studies suggest that active states  
20 might either enhance (Azouz and Gray, 1999, Reig and Sanchez-Vives, 2007) or decrease  
21 (Hasenstaub et al., 2007, Rigas and Castro-Alamancos, 2009) cortical responsiveness compared to  
22 silent states. Our results using optical stimulation of the basal forebrain suggest that responsiveness  
23 is enhanced in the medial prefrontal cortex during active states of the slow oscillation, possibly by  
24 exploiting neuronal depolarization and membrane fluctuations to amplify synaptic input (Destexhe  
25 et al., 2003, Reig et al., 2015). Similar neurophysiological mechanisms have been proposed for other  
26 cortical regions (Steriade, 2004, Munoz and Rudy, 2014). This is also supported by computational  
27 models that predict neuronal discharge exhibiting probabilistic behavior during active states, which  
28 modulates both synaptic gain and neuron transfer function (Ho and Destexhe, 2000, Destexhe and  
29 Contreras, 2006).

30

31 On the other hand, it has been shown that rhythmic neural activity in the gamma-frequency band in  
32 the medial prefrontal cortex is critical for several cognitive functions (Bosman et al., 2014); and  
33 alterations in their patterns have been associated with neuropsychiatric disorders, such as  
34 schizophrenia (Uhlhaas and Singer, 2010). Gamma oscillations in the cortex are locally generated by  
35 specific GABAergic cell populations (Cardin et al., 2009, Sohal et al., 2009). In addition, basal  
36 forebrain projection GABAergic cells can also contribute to enhance emergent gamma oscillations  
37 (Kim et al., 2015). These fast rhythms constitute a well-established marker of cortical activation and  
38 awake states (Steriade, 2004, 2006) that enhance neural circuit performance and information  
39 transfer between neurons (Sohal et al., 2009). We show here that optogenetic inhibition of basal  
40 forebrain somatostatin neurons suppresses slow waves and potentiates gamma oscillations in the  
41 cortex, which is consistent with the sleep-promoting role that has been proposed for basal forebrain  
42 somatostatin cells (Xu et al., 2015).

43

#### 44 **Locomotor activity elicited by optogenetic stimulation of the basal forebrain during resting states**



1 As a result of cortical activation, and given that the basal forebrain receives synaptic input from  
2 brainstem regions implicated in movement and arousal (Lee and Dan, 2012), we predicted that  
3 arousal and locomotion would also be increased during optogenetic inhibition of somatostatin cells.  
4 Moreover, a recent study has described a prominent projection from basal forebrain somatostatin  
5 cells directly to the ventral tegmental area and dorsal striatum (Do et al., 2016), reinforcing the idea  
6 that such neuronal population might be related with the regulation of locomotor activity and  
7 movement execution. Consistently, we found that bilateral inhibition of basal forebrain somatostatin  
8 cells elicited locomotor activity in quiescent animals. Since we did not monitor EEG or EMG activity,  
9 we cannot ascertain the stage of the sleep-wake cycle that animals were undergoing, yet it is  
10 possible that given the long periods of inactivity preceding optical stimulation (> 40 s), at least during  
11 some of the stimulation episodes, animals were sleeping. Interestingly, when animals were awake  
12 and active (i.e.; moving), optogenetic inactivation of basal forebrain somatostatin cells produced no  
13 significant differences in locomotor patterns. This suggests that the effects of basal forebrain  
14 activation triggered by somatostatin cells were strongly dependent on the ongoing behavioral state.  
15 Similar results have been previously reported for the effect of the basal forebrain on brain states.  
16 For example, in the visual cortex the effect of optogenetic activation of basal forebrain cholinergic  
17 neurons depends on the behavioral state immediately before the laser onset (Pinto et al., 2013).  
18 When animals are sitting still, cortical activity exhibits large-amplitude, low-frequency characteristic  
19 of quiet wakefulness (Crochet and Petersen, 2006). In such condition, basal forebrain activation  
20 causes a strong reduction of the low-frequency activity but no clear change at high frequencies.  
21 Instead, when animals are active (running), cortical activity shows less low-frequency activity, typical  
22 of active behavioral states (Crochet and Petersen, 2006), and basal forebrain activation causes a  
23 modest reduction of low-frequency power, but large increase at high frequencies (Pinto et al., 2013).

24  
25 In summary, our results using optogenetic stimulation in the basal forebrain show that somatostatin  
26 cells are key elements in the regulation of local circuit activity, and can indirectly modulate cortical  
27 dynamics, producing increased neuronal spiking and decreased correlated discharge. Given their  
28 pivotal role in controlling basal forebrain synaptic output, somatostatin cells become a privileged  
29 target for the synaptic regulation of activity in the basal forebrain, which is at the crossroads of top-  
30 down and bottom-up regulatory pathways (Jones, 2005, Zaborszky et al., 2012). In this sense, the  
31 recently described long-range synaptic connectivity matrix of the basal forebrain (Do et al., 2016) is  
32 highly informative, as it provides rich anatomical information that will certainly help to understand  
33 the control mechanisms of basal forebrain activity. For example, the matrix of synaptic outputs  
34 provided by somatostatin cells is highly correlated with the synaptic inputs to all basal forebrain cell  
35 types (Do et al., 2016), suggesting that somatostatin neurons not only inhibit locally other cell types  
36 in the basal forebrain, but also suppress the exogenous input conveyed to those cell types; which is  
37 consistent with sleep-promoting role of somatostatin cells (Xu et al., 2015). Conversely, suppressed  
38 firing in somatostatin neurons in the basal forebrain will likely increase synaptic activity levels in the  
39 cortex, as we have found here, but also in other target areas.

40

## 1 **Methods**

2

### 3 **Animals**

4 All procedures involving experimental animals were performed in accordance to the U.S. Public  
5 Health Service's Policy on Humane Care and Use of Laboratory Animals, reviewed and approved by  
6 university (CEBA) and national (CONICYT) bioethics committees. Experiments were carried out with  
7 8- to 30-week-old mice (from either sex), in accordance with the Comité de Ética en Bienestar  
8 Animal (CEBA 13-014).

9 Three mice strains were used, C57Bl/6J (stock N° 000664), Ai39 (stock N° 014539, B6, 129S-  
10 Gt(ROSA)26Sor<sup>tm39(CAG-HOP/EYFP)Hze</sup>/J), and Sst-IRES-Cre (stock N° 013044, Sst<sup>tm2.1(cre)Zjh</sup>/J and stock N°  
11 018973, B6N.Cg-Sst<sup>tm2.1(cre)Zjh</sup>/J). All transgenic lines were obtained from Jackson laboratories  
12 ([www.jax.org](http://www.jax.org)). We used these strains as controls and refer to them as (Natronomonas pharaonis  
13 halorhodopsin) NpHR- animals throughout the text. Double transgenic animals were obtained from  
14 breeding Sst-IRES-Cre and Ai39 mice, so that they expressed functional NpHR+ exclusively in  
15 somatostatin cells. We refer to such animals as NpHR+ throughout the text. Mice were genotyped by  
16 PCR on ear biopsies using the primers: GGG CCA GGA GTT AAG GAA GA (Common) , TCT GAA AGA  
17 CTT GCG TTT GG (Wild type Forward), TGG TTT GTC CAA ACT CAT CAA (Mutant Forward) for CRE  
18 Mice, and CTT TAA GCC TGC CCA GAA GA (Wild type Reverse), ATA TCC TGC TGG TGG AGT GG  
19 (Mutant Forward), GCC ACG ATA TCC AGG AAA GA (Mutant Reverse), TCC CAA AGT CGC TCT GAG  
20 (Wild type Forward) from Integrated DNA Technologies.

21

### 22 **In vivo electrophysiological recordings**

23 Animals were induced with isoflurane, and then anesthetized with a dose of urethane (0.8 g/kg), and  
24 after 20 minutes a dose of ketamine (40 g/kg)/ xylazine (4 g/kg) to start the surgical procedures  
25 (Negron-Oyarzo et al., 2015). Throughout the experiment 1/12 of the initial dose of urethane was  
26 administered every 20-30 minutes. All drugs were administered intraperitoneally. Rectal  
27 temperature was monitored throughout the experiment and was kept at 36 °C with a heating pad.  
28 Glucosaline solution was injected subcutaneously every 2 hours.

29 In fully anesthetized mice, the scalp was cut and retracted to expose the skull. Mice were then  
30 implanted with a customized lightweight metal head holder and the head was held in a custome  
31 made metallic holder. Next, small craniotomies (~1 mm) were made with a dental drill above the  
32 basal forebrain (AP 0.38 mm and ML 1.5 mm from Bregma) (Franklin and Paxinos, 2007)and the  
33 prefrontal cortex (AP 2.5 mm and ML 0.35 mm from Bregma). The exposed dura was cut to expose  
34 the cortex giving access for implantation of the optic fiber and recording electrodes which were  
35 inserted at a depth of 4 mm and 1-2.2 mm, respectively. Neuronal activity in prefrontal cortex was  
36 recorded extracellularly with a 32 channel-four shank silicon probe (Buzsáki 32, Neuronexus) (mean  
37 resistance 1 MΩ) stained with Dil and inserted into the brain with a 30° angle towards the midline.  
38 Neuronal activity in basal forebrain was recorded by using a 32 channel-silicon probe (A1x32-Poly3-  
39 6mm-50-177, Neuronexus) stained with Dil and connected to an optic fibre (100 μm in diameter)  
40 attached to the shank (optrode). Electrical activity was recorded with a 32-channel Intan RHD 2132  
41 amplifier board connected to an RHD2000 evaluation system (Intan Technologies). Single-unit  
42 activity and local field potential (LFP; sampling rate 20 kHz) were digitally filtered between 300 Hz –  
43 5 kHz and 0.3 Hz – 2 kHz, respectively. Spike shape and amplitude were monitored during recording  
44 to ensure that the same cells were recorded.

1 To allow local drug injection a third craniotomy was made above mPFC (AP 2.0 mm and ML 0.87 mm  
2 from Bregma) and a 50  $\mu\text{m}$ -tip pipette was inserted dorso-ventrally with a 30° angle towards the  
3 midline. For the blockade of cholinergic receptors in mPFC 200 nl of atropine (2 mM) and  
4 mecamylamine (2 mM) (1:1) (Sigma Aldrich) were microinjected at 1.4mm DV (IM-9B microinjector,  
5 Narishige), at minute 5 of the recording, while giving pulses of light on the basal forebrain and  
6 recording from mPFC.

7

### 8 **Surgery for chronic implantation**

9 Mice were anaesthetized with isoflurane (5% induction and 1.5–2% maintenance) and placed on a  
10 stereotaxic frame (David Kopf Instruments). Temperature was kept at 37° throughout the procedure  
11 (1 – 2 hours) using a heating pad. The skin was incised to expose the skull and a craniotomy (~1 mm  
12 in diameter) was made with a dental drill above the basal forebrain bilaterally (AP +0.38 mm and ML  
13 +/-1.5 mm from Bregma) (Franklin and Paxinos, 2007). Two optic fibers (diameter 200  $\mu\text{m}$ , length 11  
14 mm; Thorlabs) inserted and glued to ceramic ferrules (diameter 230  $\mu\text{m}$ , length 6.4 mm; Thorlabs)  
15 were descended through both craniotomies until reaching the basal forebrain and anchored to the  
16 skull using dental cement. After surgery, mice received a daily dose of enrofloxacin (10 mg/kg,  
17 Centrovit) for five days and supplementary analgesia with ketoprofen (5 mg/kg, Centrovit) for three  
18 days. Animals were allowed at least a week of recovery before behavioral tests.

19

### 20 **Optogenetic and somatosensory stimulation**

21 Optogenetic stimulation of basal forebrain somatostatin neurons was achieved with a 200  $\mu\text{m}$  optic  
22 fiber, (N.A. 0.37, Thorlabs) coupled to a green laser (532 nm) that provided a total light power of 0.1  
23 - 60 mW at the fibre tip. An optrode was also used, which consisted of an optic fiber (100  $\mu\text{m}$ , N.A.  
24 0.22, Neuronexus) attached to an array of electrodes, so electrical recording and optical stimulation  
25 can be achieved simultaneously on the same site. Light stimuli consisted of 5 second light pulses and  
26 power at the tip of the fibre was set between 10 to 25 mW for 200  $\mu\text{m}$  optic fibre and 4 to 6 mW for  
27 100  $\mu\text{m}$  optic fibre. A subset of experiments, both in NpHR+ and NpHR- animals, were performed  
28 with a 200  $\mu\text{m}$  optic fibre and light power of 30 mW. At such intensity there was an evident increase  
29 in both the number of activated neurons and their discharge probability in NpHR- animals. Hence,  
30 the present study is based on experiments with light power up to 25 mW.

31 Somatosensory stimulation was applied by means of a tail pinch, with a solenoid (Takasago Electric)  
32 located on the tip of the rat's tail and controlled by an Arduino UNO board (open-source  
33 microcontroller). Stimulus intensity (2 - 4 V output) and duration (typically 1 – 2 s) was manually  
34 adjusted to induce cortical activation, which was confirmed by the online visual inspection of the LFP  
35 frequency power content.

36 For chronically implanted animals, we randomly delivered a train (10 1-s square pulses at 1 Hz, 15 –  
37 20 mW) every 2 – 3 min.

38

### 39 **Open field test**

40 The testing arena (50 cm x 30 cm x 30 cm tall) was made of black painted acrylic, and illuminated by  
41 a 60 W bulb placed 150 cm above. The bilaterally implanted animal (see Surgery for details) was  
42 connected to optical fibers (200  $\mu\text{m}$  diameter, 1 m length) and placed on its cage to be habituated to  
43 the room for at least 15 min before testing. Next, the animal was placed in the testing arena for 10  
44 to 20 minutes with no laser stimulation. This procedure was performed for three days to habituate  
45 the animal both to the room and arena. On the fourth day, the animal was placed in the testing

1 arena for one hour and the stimulation protocol was then applied. The test was recorded using a  
2 digital video camera with a frame rate of 30 FPS. In some experiments, light transmission through  
3 the cannule was blocked with a small piece of aluminum foil placed between the ferrules.  
4

### 5 **Behavioral event analysis**

6 A custom MATLAB script was used to estimate animal movements. Briefly, the digital video was  
7 converted to a series of frames in RGB scale. For the whole video, consecutive frames on the green  
8 scale were used to detect the laser onset as well as to calculate the absolute value of the averaged  
9 difference between frames. Thus, any change in the image tracking could be quantified to estimate  
10 animal movements during the test. Finally, the movement estimator was z-scored to normalize  
11 different sessions and its absolute value was de-noised with a moving average (step = 50 bins). Laser  
12 effect was analyzed every time the animal was in a quiescent state before stimulation, i.e.  
13 movement estimator below 2 z-score for at least 40 s before the beginning of the laser train. The  
14 latency of the effect induced by laser was analyzed up to 40 s after the train stimulation offset (i.e.  
15 60 s after the onset of laser train) and was calculated as the interval between 20 s and the time-  
16 point when the estimator exceeded 2 z-scores. Otherwise, latency was assumed to be 40 s.  
17

### 18 **Histology and immunocytochemistry**

19 At the end of recordings, mice were terminally anesthetized and intracardially perfused with saline  
20 followed by 20 min fixation with 4% paraformaldehyde. Brains were extracted and postfixed in  
21 paraformaldehyde for a minimum of 8 h before being transferred to PBS azide and sectioned  
22 coronally (60-70  $\mu\text{m}$  slice thickness). Sections were further stained for Nissl substance. Location of  
23 shanks and optical fibre were determined in reference to standard brain atlas coordinates (Franklin  
24 and Paxinos, 2007) under a light transmission microscope.

25 For immunocytochemistry, non-recorded NpHR+ animals were terminally anesthetized and  
26 intracardially perfused with saline followed by 20 min fixation with 4% paraformaldehyde. Brains  
27 were extracted and sectioned coronally (60-70  $\mu\text{m}$  slice thickness). Sections were rinsed three times  
28 for 10 min each with phosphate buffer, incubated in 1% horse serum supplemented with 0.3% Triton  
29 X-100 in phosphate buffer for 1 h, and then incubated in 1:2000 dilutions of the parvalbumin (PVG-  
30 2014, Swant) or ChAT (AB144P, Millipore) antibody for 24 h at 4°C, followed by a 1:1000 dilution of  
31 the secondary antibody for 3-6 hours at room temperature. Secondary antibodies were conjugated  
32 to Alexa Fluor 568 (Invitrogen); and cells were photographed with the appropriate filter cubes  
33 (Nikon; B-2E-C for EYFP, and G-2E/C for Alexa) with an epifluorescence microscope (Nikon Eclipse Ci).  
34 Antibody dilutions were performed in phosphate buffer with 1% horse serum and 0.3% Triton X-100.  
35 Sections were mounted on slides with mounting medium and photographed under epifluorescence  
36 microscopy. In NpHR+ animals, antibodies against somatostatin (ab108456, Abcam) failed under  
37 standard procedures. Thus, antigen retrieval was achieved by fixation with 3% paraformaldehyde  
38 solution, and heating sections at 80 °C for 10 minutes in citric acid (pH 6.0), prior to the procedure  
39 described above.  
40

### 41 **Spike sorting**

42 Semiautomatic clustering was performed by KlustaKwik, a custom program written in C++  
43 (<https://github.com/kwikteam/klustakwik2/>). This method was applied over the 32 channels of the  
44 silicon probe, grouped in eight pseudo-tetrodes of four nearby channels. Spike clusters were

1 considered single units if their auto-correlograms had a 2-ms refractory period and their cross-  
2 correlograms with other clusters did not have sharp peaks within 2 ms of 0 lag.

3

#### 4 **Unit cross-correlation analysis**

5 Neural activity in the cortex and basal forebrain was cross-correlated with the light pulse by applying  
6 the "sliding-sweeps" algorithm (Abeles and Gerstein, 1988). A time window of  $\pm 15$  s was defined  
7 with point 0 assigned to the light onset. The timestamps of the cortical and basal forebrain spikes  
8 within the time window were considered as a template and were represented by a vector of spikes  
9 relative to  $t = 0$  s, with a time bin of 500 ms and normalized to the basal firing rate of the neurons.  
10 Thus, the central bin of the vector contained the ratio between the number of neural spikes elicited  
11 between  $\pm 250$  ms and the total number of spikes within the template. Next, the window was shifted  
12 to successive light pulses throughout the recording session, and an array of recurrences of templates  
13 was obtained. Both neural timestamps and start times of light pulses were shuffled by randomized  
14 exchange of the original inter-event intervals and the cross-correlation procedure was performed on  
15 the random sequence. The statistical significance of the observed repetition of spike sequences was  
16 assessed by comparing, bin to bin, the original sequence with the shuffled sequence. An original  
17 correlation sequence that presented a statistical distribution different from 100 permutations in at  
18 least three bins during the optical stimulation interval was considered as statistically significant, with  
19  $p < 0.01$  probability, instead of chance occurrence (see Statistics). If bins of the original correlation  
20 showed higher or lower values than the 100 permutations, neurons were classified as excited or  
21 inhibited by the light; respectively. Otherwise, neurons were identified as unaffected by optical  
22 stimulation.

23

#### 24 **Spectral analysis**

25 Time-frequency decomposition of LFP was performed with multi-taper Fourier analysis (Mitra and  
26 Pesaran, 1999) implemented in Chronux toolbox (<http://www.chronux.org>). LFP was downsampled  
27 to 500 Hz before decomposition. The same taper parameters described for the coherence analysis  
28 were used. To estimate gamma band power, spectra were normalized by  $1/f$  (Mitra and Pesaran,  
29 1999), in order to correct for the power law governing the distribution of EEG signals. To compute  
30 power and frequency of the slow/delta band oscillations, LFP was band-pass filtered with a two-way  
31 least squares FIR filter (0.5 - 2.0 Hz, `eegfilt.m` from EEGLAB toolbox;  
32 <http://www.sccn.ucsd.edu/eeglab/>); a Hilbert transform was applied and the mean value before (5  
33 s) and during the light application (5 s) was calculated.

34

#### 35 **Single-unit vs multi-unit coherence analysis**

36 Single unit versus multi-unit coherence was determined using a previously described method (Pinto  
37 et al., 2013). Briefly, multi-unit activity was defined as the summed activity of all simultaneously  
38 recorded single units except the single unit used as reference for comparison. Spiking activity was  
39 then binned at 500 Hz and coherence for each single unit versus multi-unit pair was averaged for  
40 light ON (5 s) and light OFF (5 s before light onset) epochs. Coherence was computed using the  
41 multi-taper Fourier analysis (Mitra and Pesaran, 1999) as implemented in the Chronux toolbox  
42 (<http://www.chronux.org>). For each 5 s epoch, coherence was calculated using a time-bandwidth  
43 product of  $TW = 3$  and  $2TW-1 = 5$  tapers, resulting in a half bandwidth  $W = 0.6$  Hz. Wilcoxon signed  
44 rank test was applied to estimate the statistical significance of coherence results.

45

## 1 **Detection of cortical gamma band oscillations**

2 A method developed to detect high-frequency oscillations in the hippocampus was modified to  
3 detect gamma band oscillations in the cortex (Logothetis et al., 2012). Briefly, cortical local field  
4 potential was downsampled (500 Hz) and band-pass filtered (20 – 80 Hz) using a zero phase shift  
5 non-causal finite impulse filter with 0.5 Hz roll-off. Next, the signal was rectified and low pass filtered  
6 at 20 Hz with a 4th order Butterworth filter. This procedure yields a smooth envelope of the filtered  
7 signal, which was then z-score normalized using the mean and SD of the whole signal. Epochs during  
8 which the normalized signal exceeded a 2 SD threshold were considered as events. The first point  
9 before threshold that reached 1 SD was considered the onset and the first one after threshold to  
10 reach 1 SD as the end of events. The difference between onset and end of events was used to  
11 estimate the gamma duration. We introduced a 150 ms-refractory window to prevent double  
12 detections. In order to precisely determine the mean frequency, amplitude, and duration of each  
13 event, we performed a spectral analysis using Morlet complex wavelets of seven cycles. Finally, a  
14 minimum duration criterion of 150 ms was used. The Matlab toolbox used is available online as LAN-  
15 toolbox (<http://lantoolbox.wikispaces.com/>).

16

## 17 **Statistics**

18 Data sets were tested for normality using Kolmogorov-Smirnov test and then compared with the  
19 appropriate test (t-test or Wilcoxon two sided rank test). Statistical significance of data for protocols  
20 with factorial design (i.e., involving different contrasts and light on/off conditions) were assessed  
21 using two-way repeated-measures ANOVA followed by Bonferroni post-hoc comparison or Kruskal  
22 Wallis test followed by a by Mann-Whitney U contrasts. When necessary, significance analysis was  
23 estimated by applying the `circ_corrcl.m` in the CircStat toolbox of MATLAB (The Mathworks, Inc.) to  
24 calculate the p-value for correlation between one circular and one linear random variable.  
25 Hierarchical k-means cluster analysis was performed by using `kmeans.m` in in the Stats toolbox of  
26 MATLAB.

27



## 1 **Acknowledgments**

2 We thank Drs. Mirian Schwalm, Daniel Rojas, and Hachi Manzur for reading and commenting on  
3 previous versions of this manuscript. This work was supported by the Comision Nacional de  
4 Investigacion Cientifica y Tecnologica (CONICYT) with grant Fondecyt regular 1141089 and grant  
5 CONICYT PIA ACT 1414.

## 7 **References**

- 8 Abeles M, Gerstein GL (1988) Detecting spatiotemporal firing patterns among simultaneously  
9 recorded single neurons. *Journal of neurophysiology* 60:909-924.
- 10 Azouz R, Gray CM (1999) Cellular mechanisms contributing to response variability of cortical neurons  
11 in vivo. *The Journal of neuroscience : the official journal of the Society for Neuroscience*  
12 19:2209-2223.
- 13 Bosman CA, Lansink CS, Pennartz CM (2014) Functions of gamma-band synchronization in cognition:  
14 from single circuits to functional diversity across cortical and subcortical systems. *The*  
15 *European journal of neuroscience* 39:1982-1999.
- 16 Brashear HR, Zaborszky L, Heimer L (1986) Distribution of GABAergic and cholinergic neurons in the  
17 rat diagonal band. *Neuroscience* 17:439-451.
- 18 Cardin JA, Carlen M, Meletis K, Knoblich U, Zhang F, Deisseroth K, Tsai LH, Moore CI (2009) Driving  
19 fast-spiking cells induces gamma rhythm and controls sensory responses. *Nature* 459:663-  
20 667.
- 21 Conner JM, Culbertson A, Packowski C, Chiba AA, Tuszynski MH (2003) Lesions of the Basal forebrain  
22 cholinergic system impair task acquisition and abolish cortical plasticity associated with  
23 motor skill learning. *Neuron* 38:819-829.
- 24 Crochet S, Petersen CC (2006) Correlating whisker behavior with membrane potential in barrel  
25 cortex of awake mice. *Nature neuroscience* 9:608-610.
- 26 Croxson PL, Kyriazis DA, Baxter MG (2011) Cholinergic modulation of a specific memory function of  
27 prefrontal cortex. *Nature neuroscience* 14:1510-1512.
- 28 Destexhe A, Contreras D (2006) Neuronal computations with stochastic network states. *Science*  
29 314:85-90.
- 30 Destexhe A, Rudolph M, Pare D (2003) The high-conductance state of neocortical neurons in vivo.  
31 *Nature reviews Neuroscience* 4:739-751.
- 32 Disney AA, Aoki C, Hawken MJ (2007) Gain modulation by nicotine in macaque v1. *Neuron* 56:701-  
33 713.
- 34 Do JP, Xu M, Lee SH, Chang WC, Zhang S, Chung S, Yung TJ, Fan JL, Miyamichi K, Luo L, Dan Y (2016)  
35 Cell type-specific long-range connections of basal forebrain circuit. *eLife* 5.
- 36 Duque A, Balatoni B, Detari L, Zaborszky L (2000) EEG correlation of the discharge properties of  
37 identified neurons in the basal forebrain. *Journal of neurophysiology* 84:1627-1635.
- 38 Eggermann E, Kremer Y, Crochet S, Petersen CC (2014) Cholinergic signals in mouse barrel cortex  
39 during active whisker sensing. *Cell reports* 9:1654-1660.
- 40 Franklin KBJ, Paxinos G (2007) *The Mouse Brain in Stereotaxic Coordinates*: Academic Press.
- 41 Fuster JM, Alexander GE (1971) Neuron activity related to short-term memory. *Science* 173:652-654.
- 42 Goard M, Dan Y (2009) Basal forebrain activation enhances cortical coding of natural scenes. *Nature*  
43 *neuroscience* 12:1444-1449.
- 44 Goldman-Rakic PS (1990) Cellular and circuit basis of working memory in prefrontal cortex of  
45 nonhuman primates. *Progress in brain research* 85:325-335; discussion 335-326.
- 46 Hasenstaub A, Sachdev RN, McCormick DA (2007) State changes rapidly modulate cortical neuronal  
47 responsiveness. *The Journal of neuroscience : the official journal of the Society for*  
48 *Neuroscience* 27:9607-9622.
- 49 Hassani OK, Lee MG, Henny P, Jones BE (2009) Discharge profiles of identified GABAergic in  
50 comparison to cholinergic and putative glutamatergic basal forebrain neurons across the

- 1 sleep-wake cycle. *The Journal of neuroscience : the official journal of the Society for*  
2 *Neuroscience* 29:11828-11840.
- 3 Hedreen JC, Struble RG, Whitehouse PJ, Price DL (1984) Topography of the magnocellular basal  
4 forebrain system in human brain. *Journal of neuropathology and experimental neurology*  
5 43:1-21.
- 6 Henny P, Jones BE (2008) Projections from basal forebrain to prefrontal cortex comprise cholinergic,  
7 GABAergic and glutamatergic inputs to pyramidal cells or interneurons. *The European*  
8 *journal of neuroscience* 27:654-670.
- 9 Ho N, Destexhe A (2000) Synaptic background activity enhances the responsiveness of neocortical  
10 pyramidal neurons. *Journal of neurophysiology* 84:1488-1496.
- 11 Ikeda H, Wright MJ (1972) Outer excitatory ('disinhibition') surround to receptive fields of retinal  
12 ganglion cells. *The Journal of physiology* 224:26P-27P.
- 13 Jones BE (2005) From waking to sleeping: neuronal and chemical substrates. *Trends in*  
14 *pharmacological sciences* 26:578-586.
- 15 Jones BE (2008) Modulation of cortical activation and behavioral arousal by cholinergic and  
16 orexinergic systems. *Annals of the New York Academy of Sciences* 1129:26-34.
- 17 Kim JH, Jung AH, Jeong D, Choi I, Kim K, Shin S, Kim SJ, Lee SH (2016) Selectivity of Neuromodulatory  
18 Projections from the Basal Forebrain and Locus Ceruleus to Primary Sensory Cortices. *The*  
19 *Journal of neuroscience : the official journal of the Society for Neuroscience* 36:5314-5327.
- 20 Kim T, Thankachan S, McKenna JT, McNally JM, Yang C, Choi JH, Chen L, Kocsis B, Deisseroth K,  
21 Strecker RE, Basheer R, Brown RE, McCarley RW (2015) Cortically projecting basal forebrain  
22 parvalbumin neurons regulate cortical gamma band oscillations. *Proceedings of the National*  
23 *Academy of Sciences of the United States of America* 112:3535-3540.
- 24 Kubota K, Niki H (1971) Prefrontal cortical unit activity and delayed alternation performance in  
25 monkeys. *Journal of neurophysiology* 34:337-347.
- 26 Le Van Quyen M, Staba R, Bragin A, Dickson C, Valderrama M, Fried I, Engel J (2010) Large-scale  
27 microelectrode recordings of high-frequency gamma oscillations in human cortex during  
28 sleep. *The Journal of neuroscience : the official journal of the Society for Neuroscience*  
29 30:7770-7782.
- 30 Lee MG, Hassani OK, Alonso A, Jones BE (2005) Cholinergic basal forebrain neurons burst with theta  
31 during waking and paradoxical sleep. *The Journal of neuroscience : the official journal of the*  
32 *Society for Neuroscience* 25:4365-4369.
- 33 Lee SH, Dan Y (2012) Neuromodulation of brain states. *Neuron* 76:209-222.
- 34 Lin SC, Brown RE, Hussain Shuler MG, Petersen CC, Kepecs A (2015) Optogenetic Dissection of the  
35 Basal Forebrain Neuromodulatory Control of Cortical Activation, Plasticity, and Cognition.  
36 *The Journal of neuroscience : the official journal of the Society for Neuroscience* 35:13896-  
37 13903.
- 38 Logothetis NK, Eschenko O, Murayama Y, Augath M, Steudel T, Evrard HC, Besserve M, Oeltermann  
39 A (2012) Hippocampal-cortical interaction during periods of subcortical silence. *Nature*  
40 491:547-553.
- 41 Massimini M, Huber R, Ferrarelli F, Hill S, Tononi G (2004) The sleep slow oscillation as a traveling  
42 wave. *The Journal of neuroscience : the official journal of the Society for Neuroscience*  
43 24:6862-6870.
- 44 McCormick DA, Connors BW, Lighthall JW, Prince DA (1985) Comparative electrophysiology of  
45 pyramidal and sparsely spiny stellate neurons of the neocortex. *Journal of neurophysiology*  
46 54:782-806.
- 47 Mitra PP, Pesaran B (1999) Analysis of dynamic brain imaging data. *Biophys J* 76:691-708.
- 48 Munoz W, Rudy B (2014) Spatiotemporal specificity in cholinergic control of neocortical function.  
49 *Current opinion in neurobiology* 26:149-160.

- 1 Negron-Oyarzo I, Neira D, Espinosa N, Fuentealba P, Aboitiz F (2015) Prenatal Stress Produces  
2 Persistence of Remote Memory and Disrupts Functional Connectivity in the Hippocampal-  
3 Prefrontal Cortex Axis. *Cerebral cortex* 25:3132-3143.
- 4 Pinto L, Goard MJ, Estandian D, Xu M, Kwan AC, Lee SH, Harrison TC, Feng G, Dan Y (2013) Fast  
5 modulation of visual perception by basal forebrain cholinergic neurons. *Nature neuroscience*  
6 16:1857-1863.
- 7 Reig R, Sanchez-Vives MV (2007) Synaptic transmission and plasticity in an active cortical network.  
8 *PloS one* 2:e670.
- 9 Reig R, Zerlaut Y, Vergara R, Destexhe A, Sanchez-Vives MV (2015) Gain modulation of synaptic  
10 inputs by network state in auditory cortex in vivo. *The Journal of neuroscience : the official*  
11 *journal of the Society for Neuroscience* 35:2689-2702.
- 12 Rigas P, Castro-Alamancos MA (2009) Impact of persistent cortical activity (up States) on intracortical  
13 and thalamocortical synaptic inputs. *Journal of neurophysiology* 102:119-131.
- 14 Sanchez-Vives MV, McCormick DA (2000) Cellular and network mechanisms of rhythmic recurrent  
15 activity in neocortex. *Nature neuroscience* 3:1027-1034.
- 16 Sirota A, Montgomery S, Fujisawa S, Isomura Y, Zugaro M, Buzsaki G (2008) Entrainment of  
17 neocortical neurons and gamma oscillations by the hippocampal theta rhythm. *Neuron*  
18 60:683-697.
- 19 Smith JE, Co C, Yin X, Sizemore GM, Liguori A, Johnson WE, 3rd, Martin TJ (2004) Involvement of  
20 cholinergic neuronal systems in intravenous cocaine self-administration. *Neuroscience and*  
21 *biobehavioral reviews* 27:841-850.
- 22 Sohal VS, Zhang F, Yizhar O, Deisseroth K (2009) Parvalbumin neurons and gamma rhythms enhance  
23 cortical circuit performance. *Nature* 459:698-702.
- 24 Steriade M (2004) Acetylcholine systems and rhythmic activities during the waking--sleep cycle.  
25 *Progress in brain research* 145:179-196.
- 26 Steriade M (2006) Grouping of brain rhythms in corticothalamic systems. *Neuroscience* 137:1087-  
27 1106.
- 28 Steriade M, McCormick DA, Sejnowski TJ (1993a) Thalamocortical oscillations in the sleeping and  
29 aroused brain. *Science* 262:679-685.
- 30 Steriade M, Nunez A, Amzica F (1993b) A novel slow (< 1 Hz) oscillation of neocortical neurons in  
31 vivo: depolarizing and hyperpolarizing components. *The Journal of neuroscience : the official*  
32 *journal of the Society for Neuroscience* 13:3252-3265.
- 33 Stujenske JM, Spellman T, Gordon JA (2015) Modeling the Spatiotemporal Dynamics of Light and  
34 Heat Propagation for In Vivo Optogenetics. *Cell reports* 12:525-534.
- 35 Thiele A, Herrero JL, Distler C, Hoffmann KP (2012) Contribution of cholinergic and GABAergic  
36 mechanisms to direction tuning, discriminability, response reliability, and neuronal rate  
37 correlations in macaque middle temporal area. *The Journal of neuroscience : the official*  
38 *journal of the Society for Neuroscience* 32:16602-16615.
- 39 Timofeev I, Contreras D, Steriade M (1996) Synaptic responsiveness of cortical and thalamic  
40 neurones during various phases of slow sleep oscillation in cat. *The Journal of physiology* 494  
41 ( Pt 1):265-278.
- 42 Uhlhaas PJ, Singer W (2010) Abnormal neural oscillations and synchrony in schizophrenia. *Nature*  
43 *reviews Neuroscience* 11:100-113.
- 44 Valderrama M, Crepon B, Botella-Soler V, Martinerie J, Hasboun D, Alvarado-Rojas C, Baulac M,  
45 Adam C, Navarro V, Le Van Quyen M (2012) Human gamma oscillations during slow wave  
46 sleep. *PloS one* 7:e33477.
- 47 Whitehouse PJ, Price DL, Struble RG, Clark AW, Coyle JT, Delon MR (1982) Alzheimer's disease and  
48 senile dementia: loss of neurons in the basal forebrain. *Science* 215:1237-1239.
- 49 Xu M, Chung S, Zhang S, Zhong P, Ma C, Chang WC, Weissbourd B, Sakai N, Luo L, Nishino S, Dan Y  
50 (2015) Basal forebrain circuit for sleep-wake control. *Nature neuroscience* 18:1641-1647.

- 1 Zaborszky L, Duque A (2000) Local synaptic connections of basal forebrain neurons. Behavioural
- 2 brain research 115:143-158.
- 3 Zaborszky L, van den Pol A, Gyengesi E (2012) The Basal Forebrain Cholinergic Projection System in
- 4 Mice. In: The Mouse Nervous System, pp 684-718: Elsevier Inc.
- 5
- 6

1 **Figures**

2

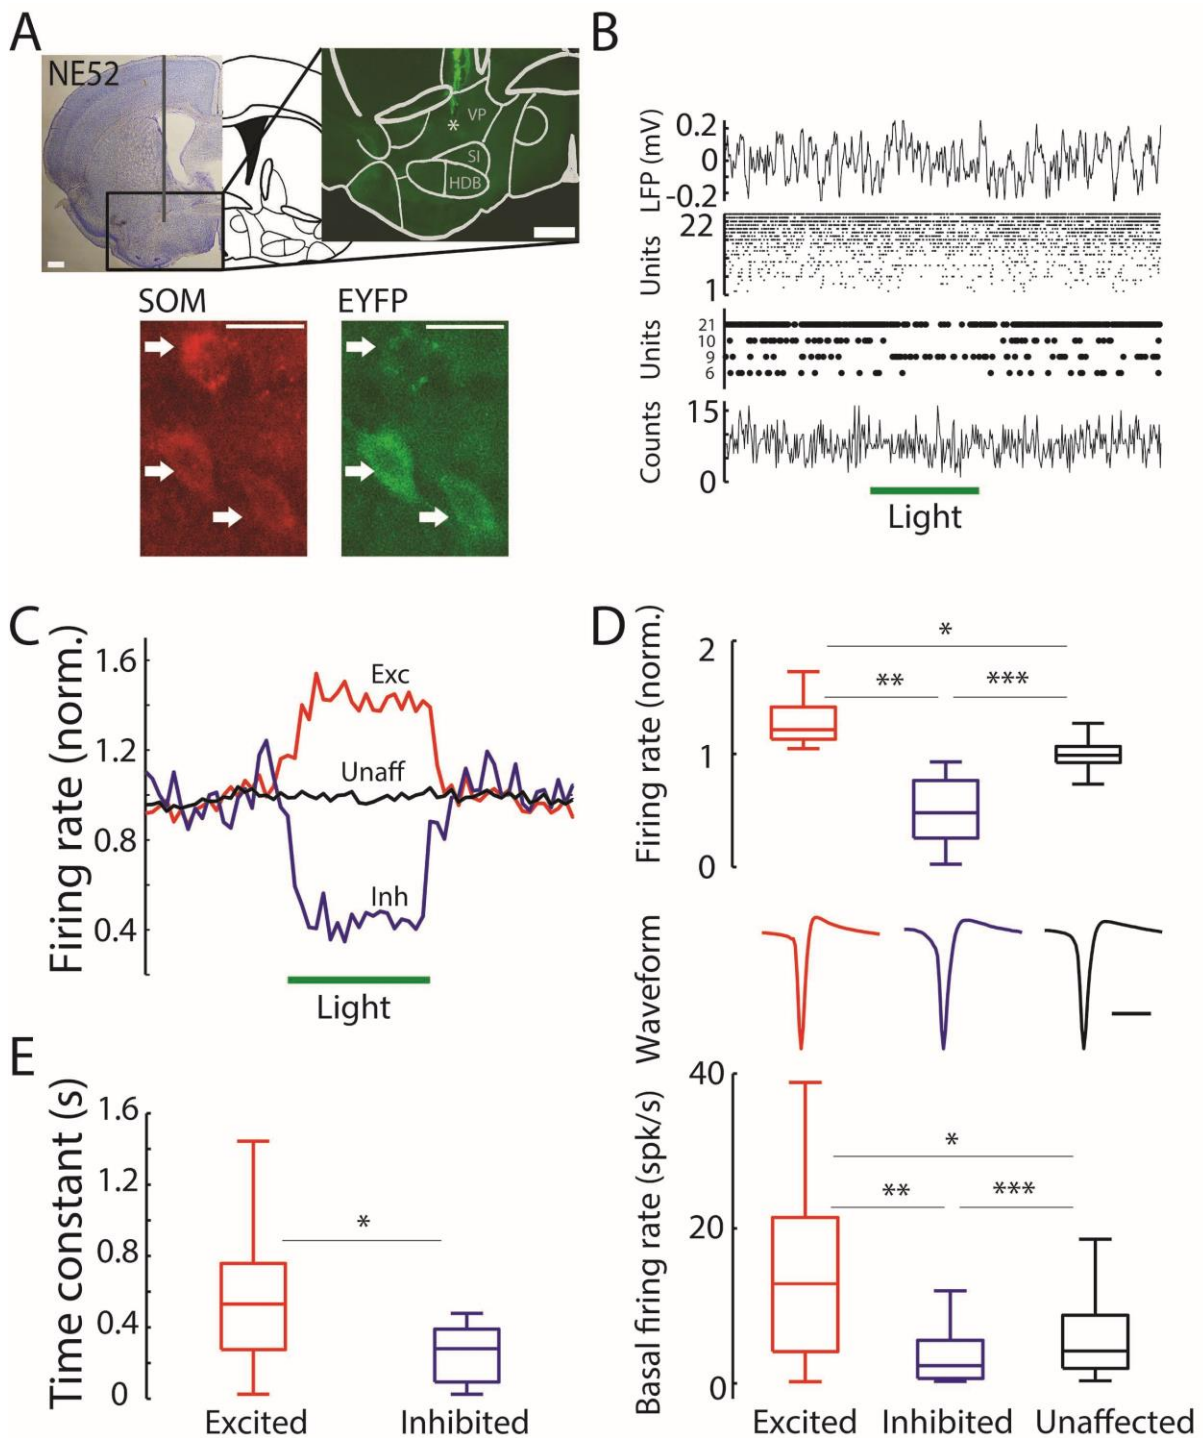

3 **Fig1**

4

5 **Figure 1.** Optogenetic inactivation of somatostatin cells in the basal forebrain. **A**, Nissl stained brain  
6 section and schematic coronal drawing of the mouse brain (mouse NE52, section 46, adapted from  
7 (Franklin and Paxinos, 2007)). Scale bar: 400  $\mu$ m. Inset: fluorescence microscopy photomicrograph of  
basal forebrain region with optrode stained with Dil (arrow). Gray lines depict anatomical nuclei.

1 Scale bar: 200  $\mu\text{m}$ . Bottom, fluorescence microscopy photomicrograph shows a cluster of cells co-  
2 expressing NpHR (EYFP) and somatostatin (SOM) in the basal forebrain. **B**, electrophysiological  
3 recordings from the brain location shown in (A). From top to bottom: LFP (filtered 0.1 Hz - 5 kHz),  
4 raster plots for all simultaneously recorded cells, raster plot for laser-responsive units, and multiunit  
5 histogram. Binsize: 5 ms. **C**, average normalized discharge probability for excited (Exc., red line,  $n =$   
6 56), inhibited (Inh., blue line,  $n = 29$ ), and unaffected (Unaff., black line,  $n = 245$ ) neurons recorded in  
7 the basal forebrain ( $n = 4$  animals). Horizontal bar depicts laser stimulation (5 s, 4-6 mW fiber  
8 diameter 100  $\mu\text{m}$ ). Binsize: 250 ms. **D**, normalized discharge probability during optical stimulation  
9 (top panel, Kruskal-Wallis test,  $p = 5.44 \times 10^{-35}$ ; Wilcoxon rank-sum test,  $*p = 5.65 \times 10^{-24}$ ,  $**p =$   
10  $5.39 \times 10^{-14}$ ,  $***p = 1.11 \times 10^{-16}$ ), spike waveform average (middle panel), and basal firing rate (bottom  
11 panel, Kruskal-Wallis test,  $p = 2.06 \times 10^{-8}$ ; Wilcoxon rank-sum test,  $*p = 8.17 \times 10^{-8}$ ,  $**p = 4.10 \times 10^{-5}$ ,  
12  $***p = 0.0125$ ) for excited, inhibited, and unaffected cells; respectively. Scale bar: 1 ms. **E**,  
13 exponential time constants from curve fittings to the early response of neurons excited or inhibited  
14 by optical stimulation (Wilcoxon rank-sum test,  $*p = 0.0072$ ).  
15



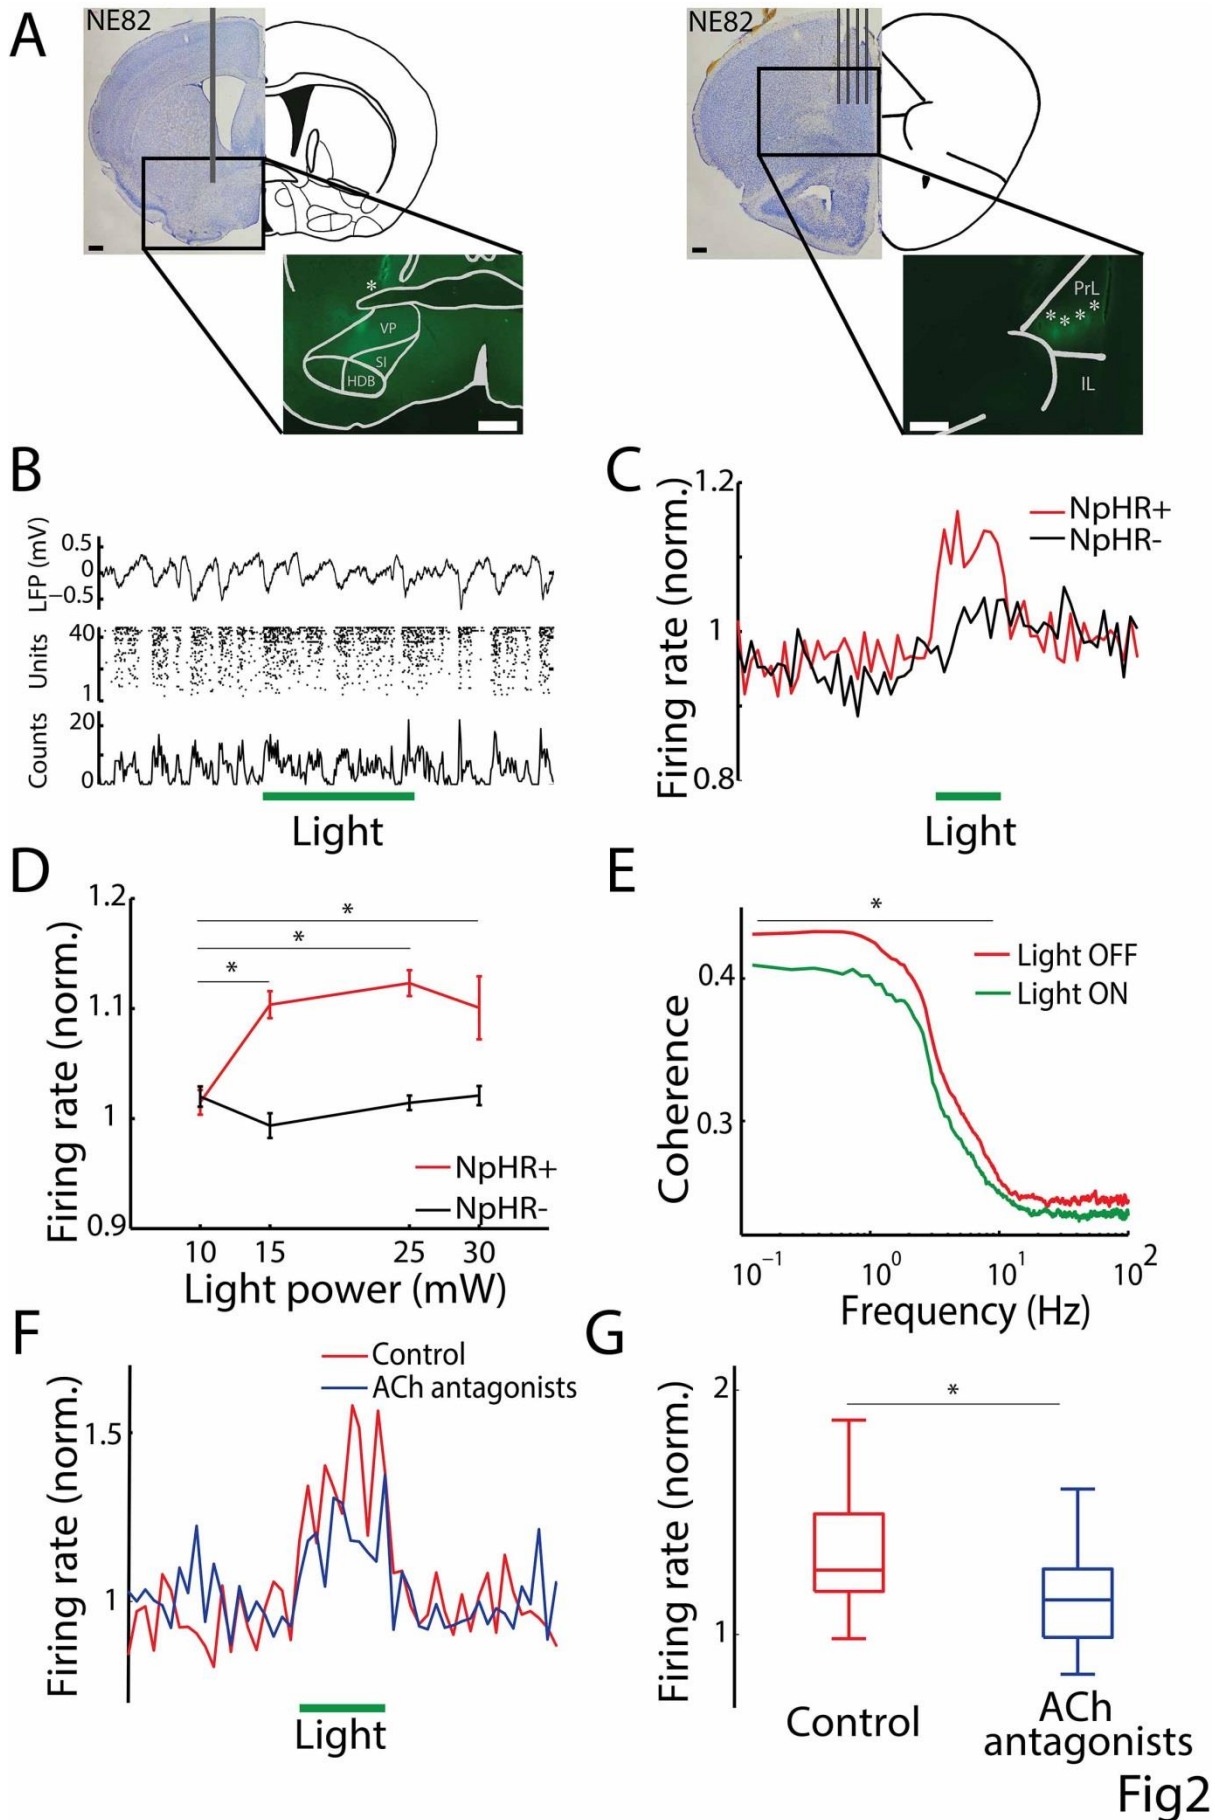

1 **Figure 2.** Neuronal activity in the prefrontal cortex during optical inhibition of basal forebrain  
2 somatostatin cells. **A**, photographic montage of Nissl stained brain sections and schematic coronal  
3 drawing. Left, optical fiber location in the basal forebrain (gray vertical line) (mouse NE82; left,  
4 section 46, adapted from (Franklin and Paxinos, 2007)). Scale bar: 400  $\mu$ m. Inset: fluorescence  
5 microscopy photomicrograph of basal forebrain region with optical fiber tract stained with Dil. Gray  
6 lines depict nuclei on atlas section. Scale bar: 200  $\mu$ m. Right: silicon probe location (brain NE82; right,  
7 section 16, adapted from (Franklin and Paxinos, 2007)). Scale bar: 400  $\mu$ m. Inset: fluorescence  
8 microscopy of prefrontal cortex with silicon probe stained with Dil. Gray lines depict prefrontal  
9 cortex borders on atlas section. Scale bar: 200  $\mu$ m. **B**, example electrophysiological recording from  
10 the brain shown in (A). Top panel: LFP; middle panel: raster plot for all recorded units; bottom panel:  
11 multiunit histogram. Binsize: 4 ms. **C**, normalized discharge probability averages for animals  
12 expressing functional halorhodopsin (NpHR+, red line, n = 1308 units, 7 animals) and control animals  
13 (NpHR-, black line, n = 851 units, 3 animals). Optogenetic stimulation produced significantly different  
14 responses ( $W = 74742$ ,  $p < 10^{-6}$ , Wilcoxon signed-rank test). Horizontal bar indicates optical  
15 stimulation (5 s, 15-25 mW). Binsize: 500 ms. Note slower and smaller response in control animals  
16 (NpHR-), likely due to temperature effects (supplementary figure 4). Note nonspecific neuronal  
17 activation in NpHR- animals, which was likely due tissue heating from laser stimulation (Stujenske et  
18 al., 2015). **D**, Plot depicting average discharge probability versus light power (NpHR+, n = 9 animals;  
19 NpHR-, n = 5 animals). Error bars, s.e.m. \* $p < 0.001$  (Two-way ANOVA test and Bonferroni *post hoc*  
20 correction). **E**, Average coherence between single unit and multi-unit activity in the presence (green  
21 line, light on) or absence (black line, light off) of optogenetic stimulation. Laser-induced reduction of  
22 coherence was statistically significant only for low frequencies ( $< 10$  Hz,  $W = 142155$ ,  $p < 10^{-6}$ ,  
23 Wilcoxon signed rank test, n = 1109 cells, 7 NpHR+ animals). **F**, average normalized discharge  
24 probability of cortical neurons before (black line) and after (blue line) the local injection of  
25 cholinergic blockers (200 nl, 2 mM, atropine and mecamylamine) in the prefrontal cortex Binsize:  
26 500 ms. Horizontal green line depicts laser stimulation (5 s, 15 - 25 mW). **G**, normalized discharge  
27 probability during optical stimulation before (black box) and after (blue box) the local injection of  
28 cholinergic blockers ( $W = 1438$ ,  $p < 10^{-6}$ , Wilcoxon signed rank test, n = 64 cells, 3 animals).  
29

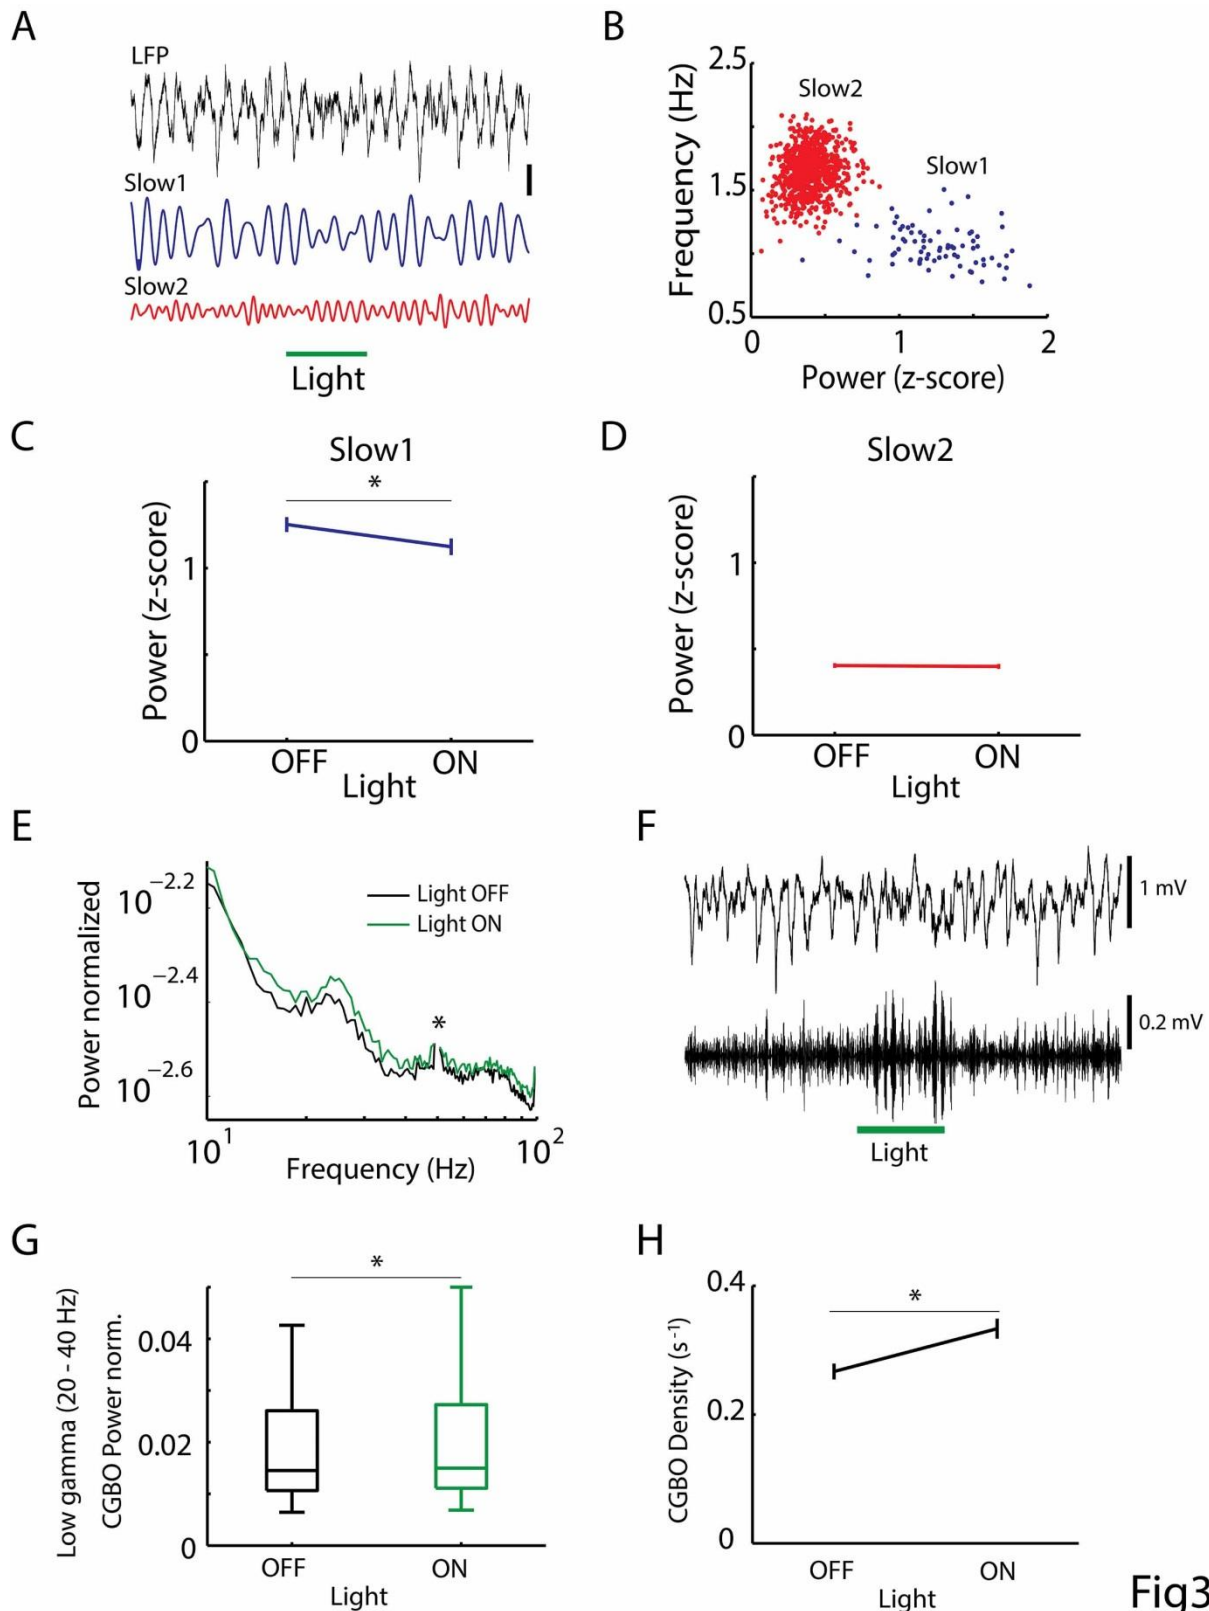

**Fig3**

1  
2 **Figure 3.** Cortical oscillations during optical inhibition of basal forebrain somatostatin cells. **A**,  
3 example of LFP (filtered 0.1 Hz – 5 kHz, top panel) and slow oscillations in two frequency bands (slow  
4 1, filtered 0.5-1 Hz, middle panel; and slow 2, bottom panel, filtered 1-2 Hz) from cortical activity.  
5 Horizontal green line denotes laser stimulation (5 s, 25 mW). Scale bar: 0.4 mV. Note that only slow

1 1 oscillations are affected by light. **B**, scatter plot of the normalized power versus main frequency of  
2 slow oscillations (n = 870 epochs, 7 animals). Two frequency bands were identified by cluster  
3 analysis (see Methods), i.e., slow 1 (blue dots) and slow 2 (red dots). **C**, normalized power for slow 1  
4 oscillations in the presence (on) and absence (off) of optical stimulation. Gray lines indicate  
5 individual values (n = 77). Black line represents mean  $\pm$  s.e.m (paired t-test,  $*p = 0.0009316$ ). **D**,  
6 normalized power for slow 2 oscillations in the presence (on) and absence (off) of optical stimulation  
7 (n = 793, mean  $\pm$  s.e.m , paired t-test,  $p = 0.22603$ ). **E**, average power spectral distribution of cortical  
8 LFP (n = 7 NpHR+ animals) in the presence (green line) or absence (black line) of laser stimulation.  
9 Spectral distribution was normalized by 1/f factor (see Methods). Asterisk (\*) depicts 50 Hz-artifact  
10 removal. **F**, example of wideband (filtered 0.1 Hz – 5 kHz, top panel) and gamma band (filtered 20 –  
11 80 Hz, bottom panel) cortical LFP (NE49 reg01 pulse9 chan19). Horizontal green line shows laser  
12 stimulation (5 s, 25 mW). **G**, box plots for the average power of low gamma oscillations (20–40 Hz,  
13  $*p = 0.0018$ , Wilcoxon signed-rank test). For high gamma oscillations (55-80 Hz) see supplementary  
14 figure 8. **H**, Plots (mean  $\pm$  s.e.m.) show the density of low gamma episodes (paired t-test,  $*p =$   
15  $5.76 \times 10^{-8}$ ).  
16

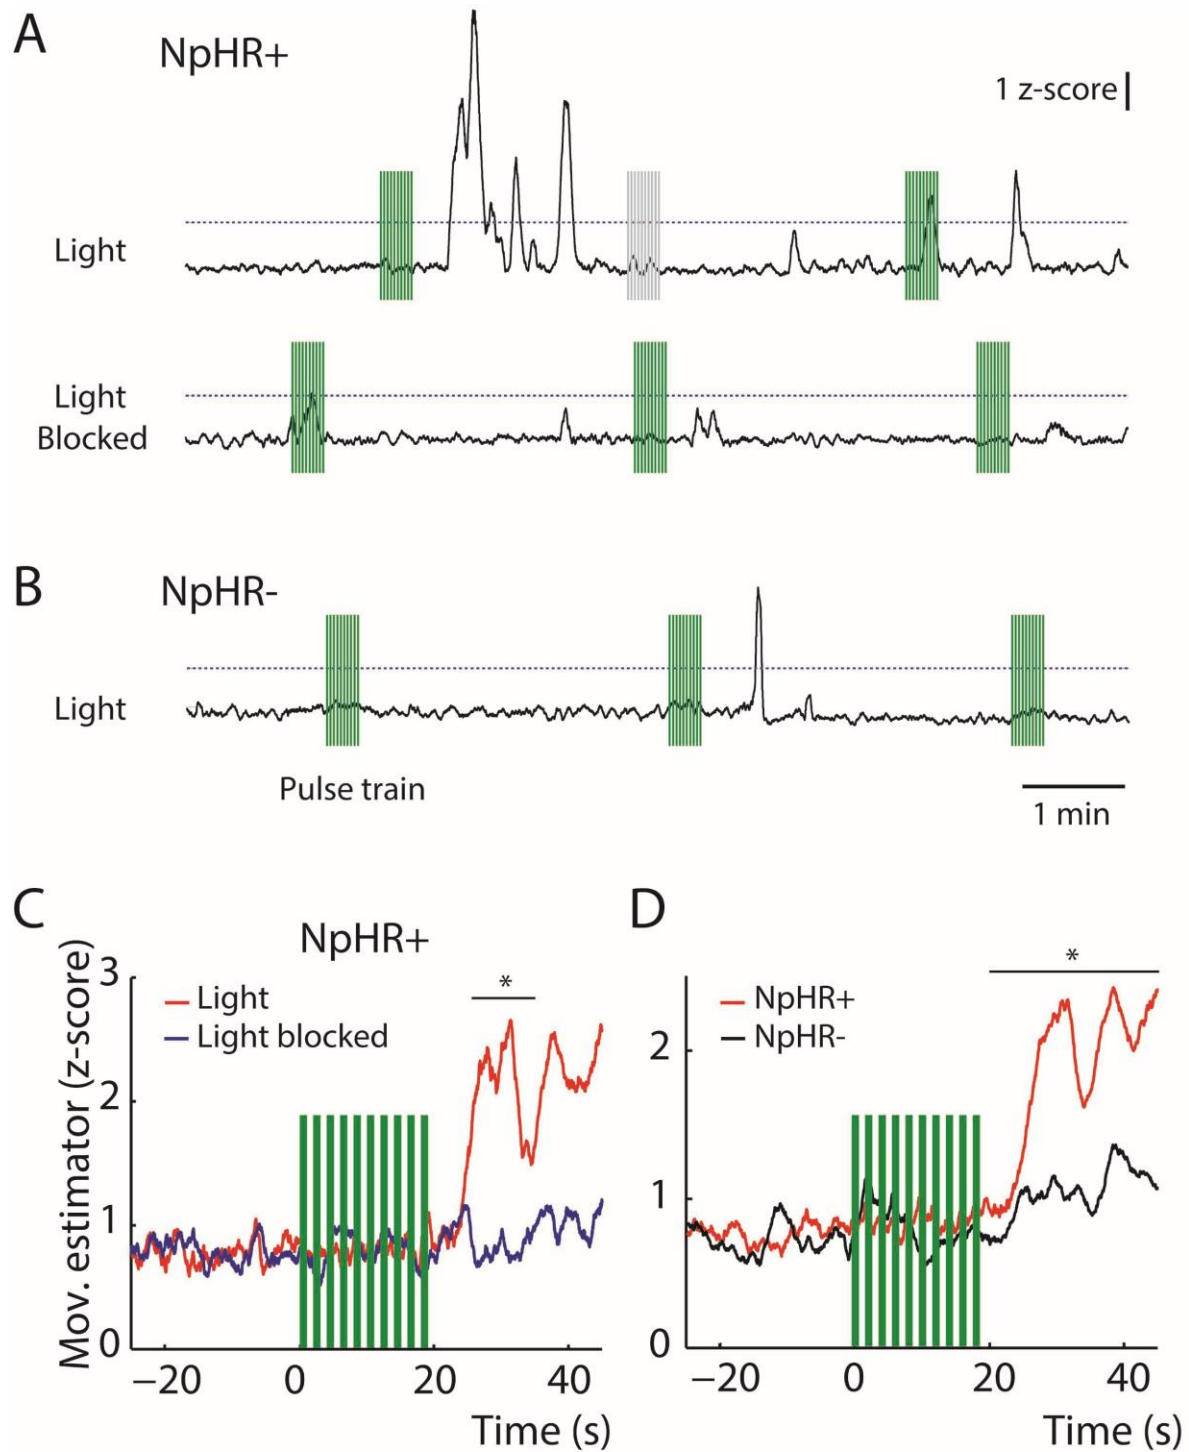

Fig4

1  
2 **Figure 4.** Locomotor activity following optogenetic inhibition of basal forebrain somatostatin  
3 neurons in resting mice. **A**, top panel: example of movement recorded over time in an NpHR+ animal  
4 upon laser stimulation of the basal forebrain. Bottom panel: movement is not induced when the  
5 light path is blocked between ferrules. **B**, example of a control NpHR- animal stimulated by light  
6 delivered to the basal forebrain. Vertical bars depict laser train stimulation delivered when the

1 animal is quiescent (green) or moving (grey) 40 s before stimulation. Dashed line indicates threshold  
2 (2 z-score) used to calculate movement amplitude. **C**, average response of NpHR+ animals (n = 3) to  
3 optogenetic inactivation of basal forebrain somatostatin cells with or without light path blockade.  
4 Response latency (from the end of stimulation) is significantly shorter when the light path is not  
5 blocked (seconds: 7.1 (range 0.3 – 40) vs 16.8 (range 0.3 – 40), p = 0.035, Wilcoxon rank-sum test).  
6 Response amplitude after the end of train stimulation is larger when the light path was not blocked  
7 (z-score: 2.96 (range 1.1 – 38.6) vs 2.28 (range 1.4 – 9.4), p = 0.004, Wilcoxon rank-sum test). **D**,  
8 average response of NpHR+ (n = 5 mice, 60 trials) and NpHR- (n = 5, 49 trials) animals to optogenetic  
9 inactivation of basal forebrain somatostatin cells. Response latency (from the end of stimulation) is  
10 significantly shorter for NpRH+ animals (seconds: 11.8 (range 0.03 – 45) vs 45 (range 0.03 – 45), p =  
11 0.0045, Wilcoxon rank-sum test). Response amplitude (after the end of train stimulation) is larger for  
12 NpHR+ animals (z-score: 2.92 (range 1.1 – 38.6) vs 2.27 (range 0.79 – 11.5), p = 0.0028, Wilcoxon  
13 rank-sum test). Note significant locomotor activation in NpHR- animals compared to the baseline,  
14 which likely results from nonspecific tissue heating during laser stimulation. Asterisks in C and D  
15 indicate statistical significance when the Wilcoxon rank-sum test was applied to compare both  
16 curves within a non-overlapping time window of 5 s. Pulse train; 10 1s pulses at 0.5 Hz, 15-20 mW.  
17



1 **Supplementary Material**

2

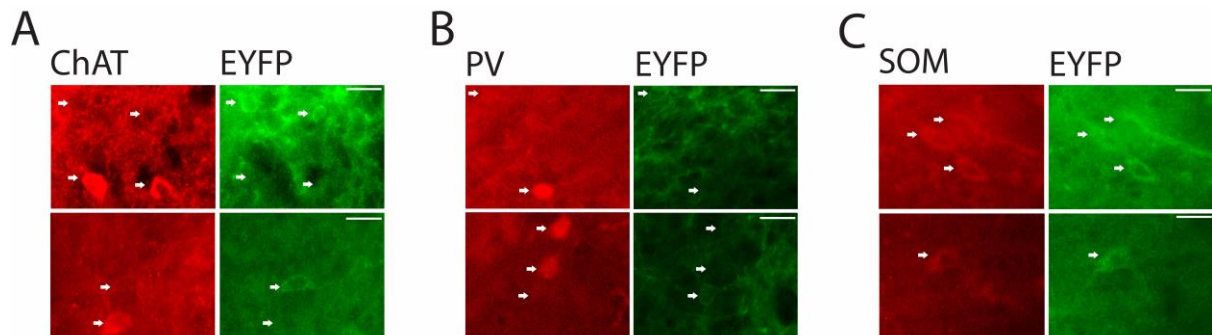

3 **FigS1**

4 **Supplementary Figure 1.** Halorhodopsin expression in the basal forebrain. Fluorescent micrographs  
5 showing the expression of choline acetyl transferase (ChAT, **A**), parvalbumin (PV, **B**), and  
6 somatostatin (SOM, **C**) in the basal forebrain of NpHR+ animals. EYFP depicts neurons expressing  
7 NpHR. Arrows depict neurons expressing one or both markers in each panel. Note no overlap  
8 between EYFP and ChAT (0%, n = 54 cells), little overlap between EYFP and PV (5%, n = 174 cells),  
9 and large overlap between EYFP and SOM (91%, n = 118 cells). Scale bar 20 um.

10

## Tail pinch inhibited cells

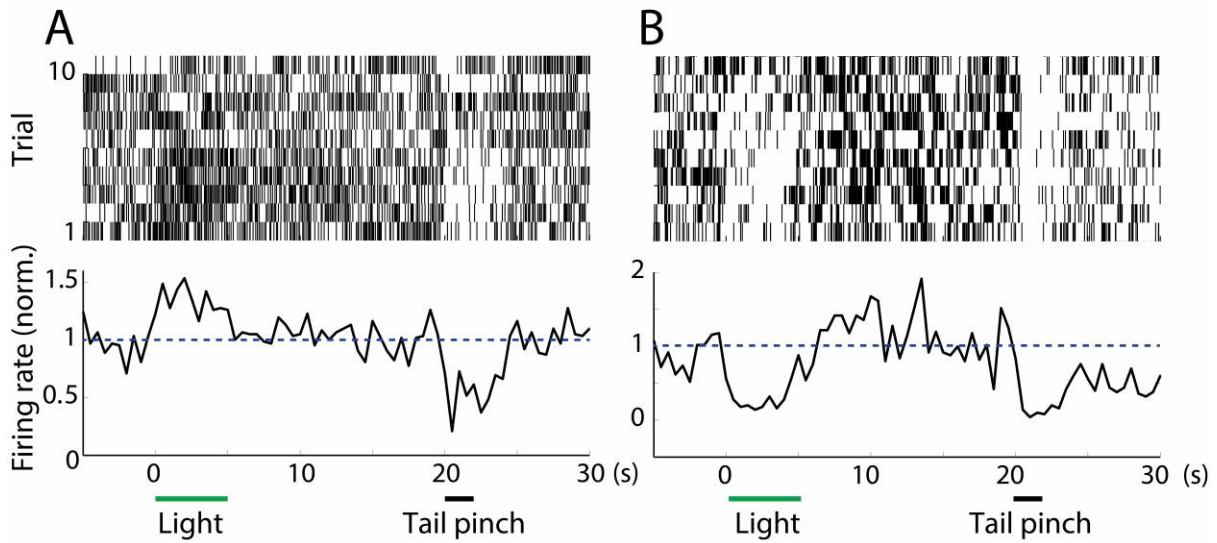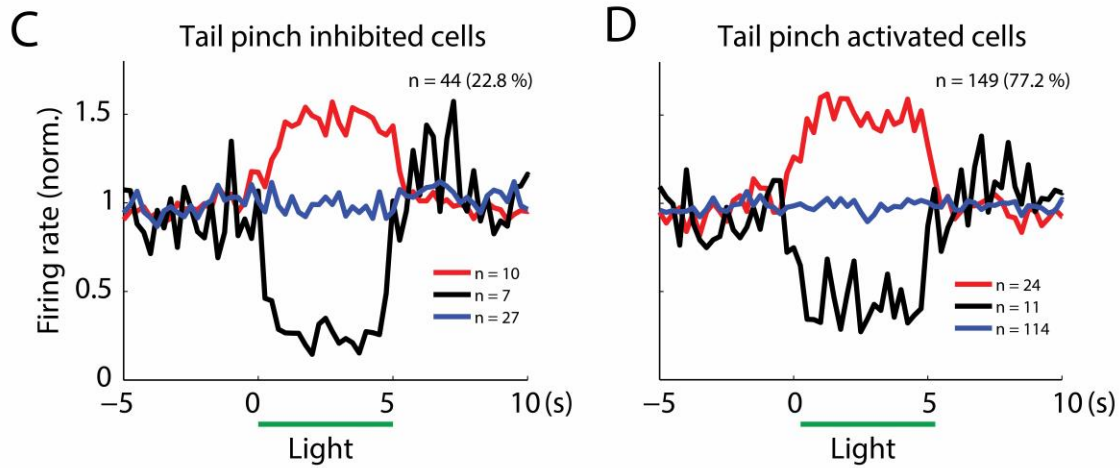

## Laser inhibited cells

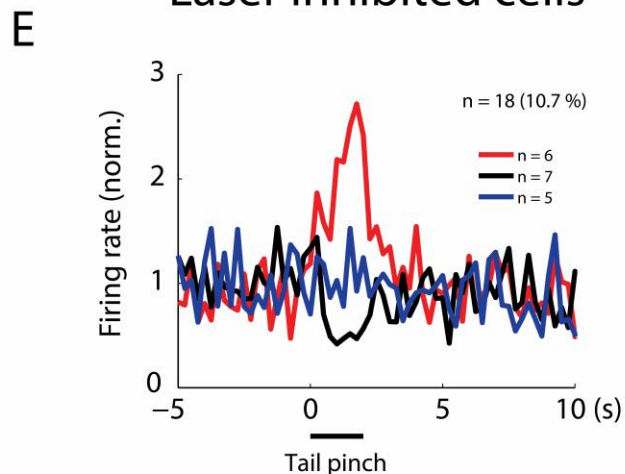

FigS2

1  
2 **Supplementary Figure 2.** Local neuronal response patterns to combined optical and somatosensory  
3 stimulation in the basal forebrain. Examples of optogenetic excitation (A) or inhibition (B) of putative  
4 ChAT-negative cells, identified by their inhibition during somatosensory stimulation (tail pinch,  
5 (Hassani et al., 2009)). Top panels: raster plots; bottom panels: cumulative normalized discharge

1 probability. Binsize: 500 ms. **C**, average normalized discharge probability for basal forebrain tail  
2 pinch-inhibited neurons ( $n = 44$  cells, 4 animals). Cells were either excited (red line,  $n = 10$ ), inhibited  
3 (black line,  $n = 7$ ), or unaffected (blue line,  $n = 27$ ) by light stimulation (horizontal green bar, 5 s, 15 –  
4 25 mW). Binsize: 250 ms. **D**, average normalized discharge probability for tail pinch-excited neurons  
5 ( $n = 149$  cells, 4 animals). Cells were either excited (red line,  $n = 24$ ), inhibited (black line,  $n = 11$ ), or  
6 unaffected (blue line,  $n = 114$ ) by optical stimulation (horizontal black bar, 5 s, 15-25 mW). Binsize:  
7 250 ms. **E**, average normalized discharge probability for basal forebrain somatostatin cells ( $n = 18$   
8 neurons, 2 animals). Cells were either excited (red line,  $n = 6$ ), inhibited (black line,  $n = 7$ ), or  
9 unaffected (blue line,  $n = 5$ ) by somatosensory stimulation (horizontal black bar, 5 s, solenoid  
10 powered with 2 – 4 V).  
11

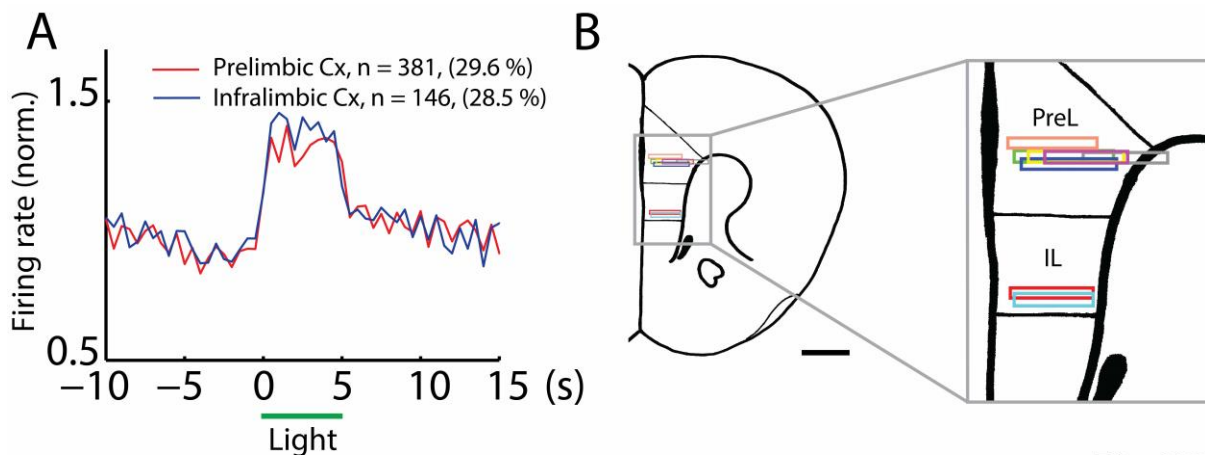

FigS3

12 **Supplementary Figure 3.** Effect of basal forebrain optogenetic stimulation on prefrontal cortex  
13 and infralimbic regions of the prefrontal cortex. **A**, average normalized discharge probability of neurons  
14 excited by light on prefrontal (red line,  $n = 381$  cells, 29.6%, 5 animals) or infralimbic (blue line,  $n =$   
15 146 cells, 28.5%, 2 animals) regions of the prefrontal cortex. Binsize: 500 ms. Horizontal green line  
16 depicts laser stimulation (5 s, 15 – 25 mW). Discharge probabilities were significantly different in  
17 prefrontal ( $1.36 \pm 0.02$ ) and infralimbic ( $1.31 \pm 0.01$ ) cortex (two-sample t-test,  $p = 0.0372$ ). **B**,  
18 anatomical representation of recording locations (horizontal rectangles) in both cortical regions ( $n =$   
19 7 animals), based on plate 13 (Franklin and Paxinos, 2007). Scale bar: 1 mm.  
20  
21

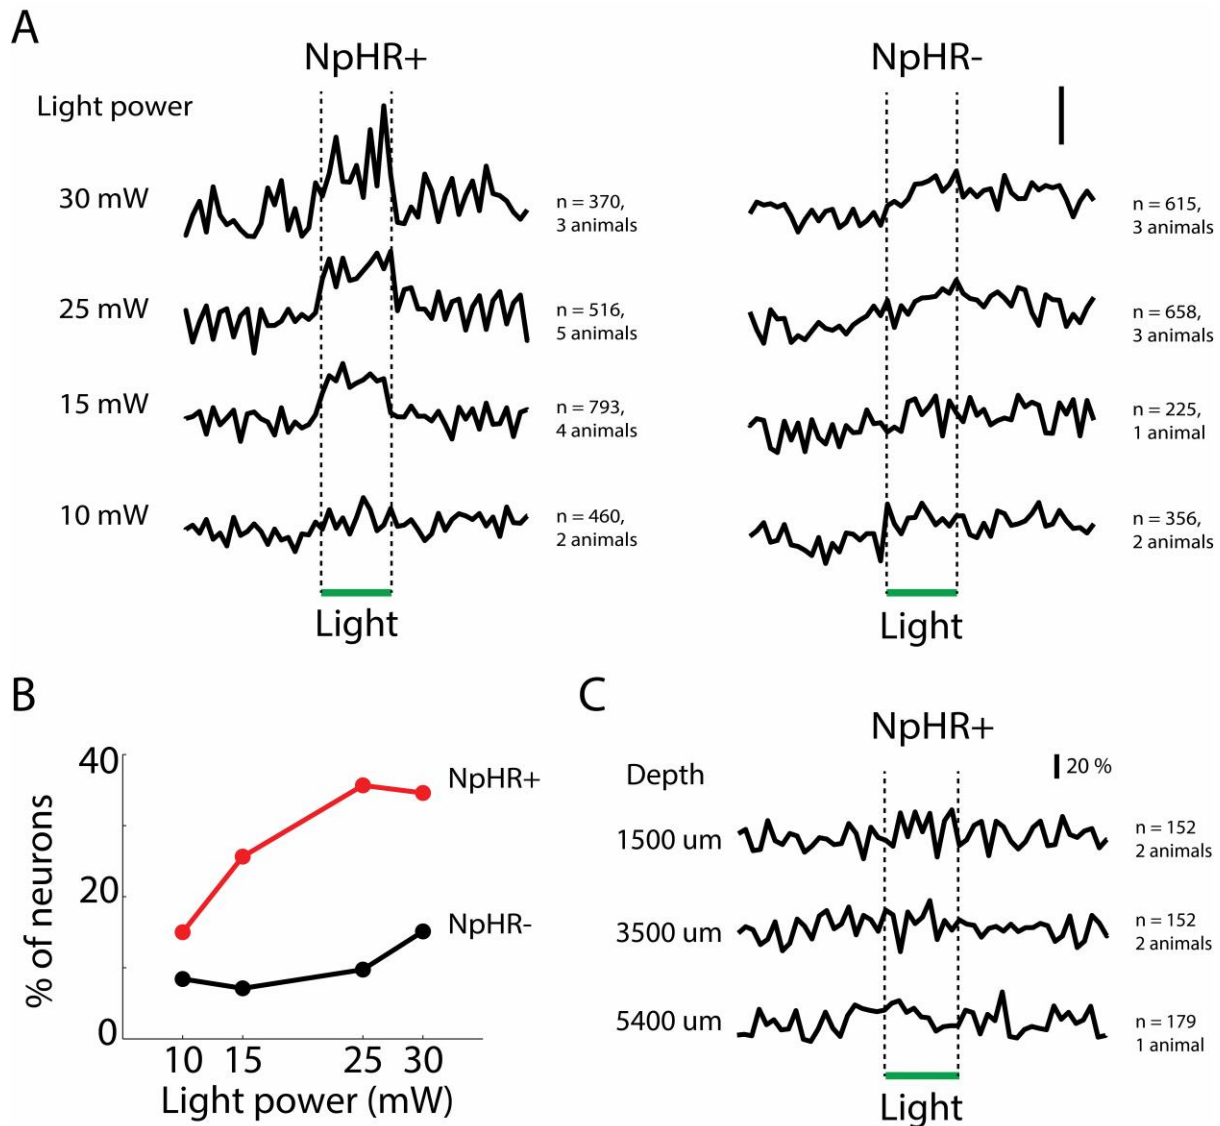

FigS4

1  
2 **Supplementary Figure 4.** Neuronal spiking in the prefrontal cortex in response to optogenetic  
3 stimulation. **A**, average normalized discharge probability of cortical cells in NpHR+ (left column) and  
4 NpHR- (right panel) animals. Horizontal bar indicates laser stimulation (5 s). Scale bar: 20% **B**,  
5 fraction of cortical neurons activated in relation to laser power on NpHR+ (red line) and NpHR- (black  
6 line) animals. Note that a minimum of ~10% of cortical neurons were activated in control animals  
7 (NpHR-), with little effect on global spiking patterns. Nonspecific neuronal activation was likely due  
8 rise in temperature due to laser stimulation (Stujenske et al., 2015). **C**, Neuronal spiking in the  
9 prefrontal cortex in response to optogenetic stimulation in different anatomical locations in NpHR+  
10 animals. Top trace, dorsal striatum (1500 um); middle trace, ventral striatum, (3500 um); bottom  
11 trace, olfactory tubercle, (5400 um). None of the responses was statistically significant ( $p > 0.05$ ,  
12 Wilcoxon signed-rank test). Horizontal green bar depicts laser stimulation; 5 s, 15 – 25 mW  
13

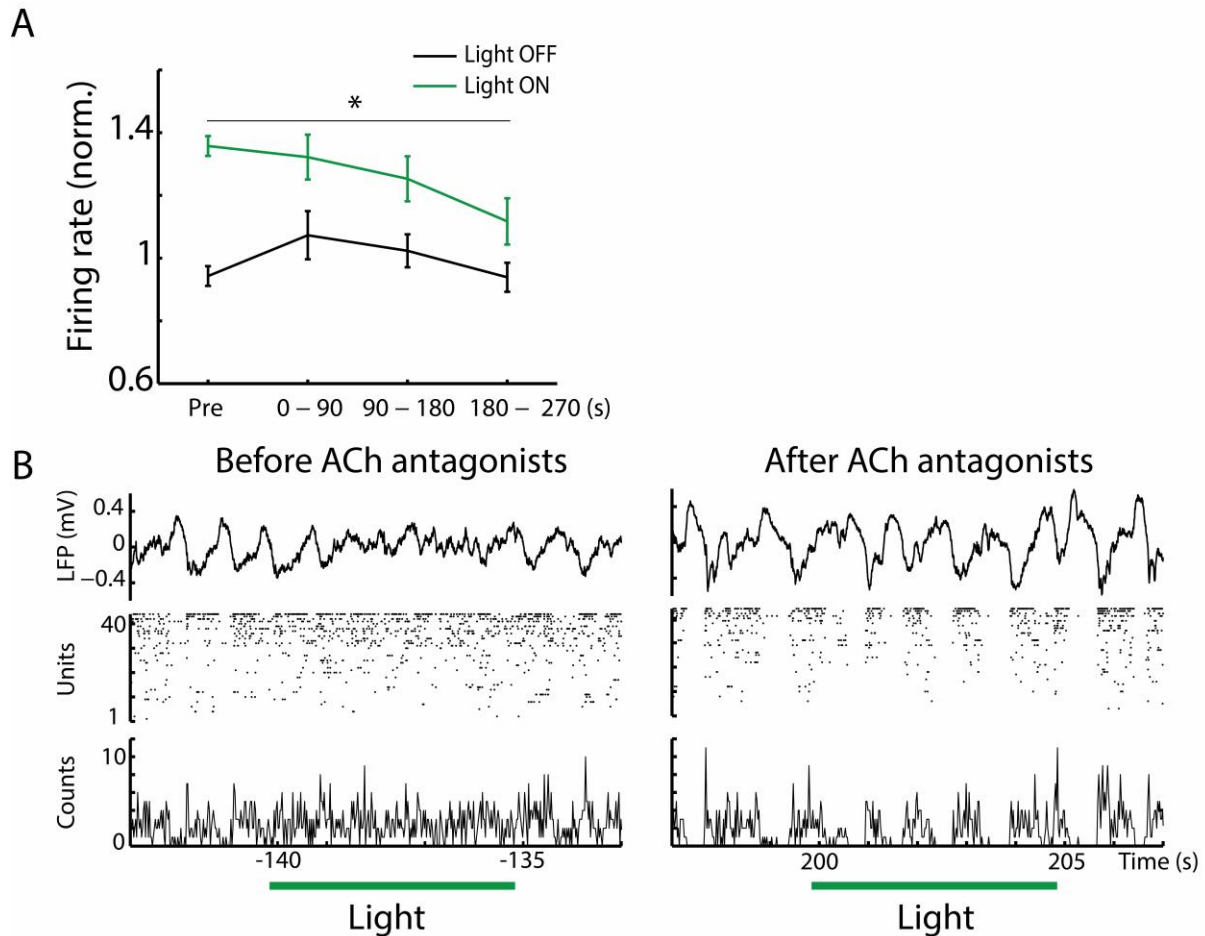

**FigS5**

1  
2 **Supplementary Figure 5.** Role of cholinergic receptors in cortical spiking during optical inhibition of  
3 basal forebrain somatostatin cells. **A.** Average discharge probability at different time points in  
4 relation to drug application (time zero), in the presence (gray line) or absence (black line) of laser  
5 stimulation. **B.** example electrophysiological recording (NE84 reg12 chan1) showing response  
6 patterns before and after drug administration. Drug was injected at second zero (not shown). From  
7 top to bottom: LFP, raster plot for all cells, and multiunit histogram. Binsize: 2 ms. Horizontal green  
8 lines show laser stimulation (5 s, 25 mW).  
9

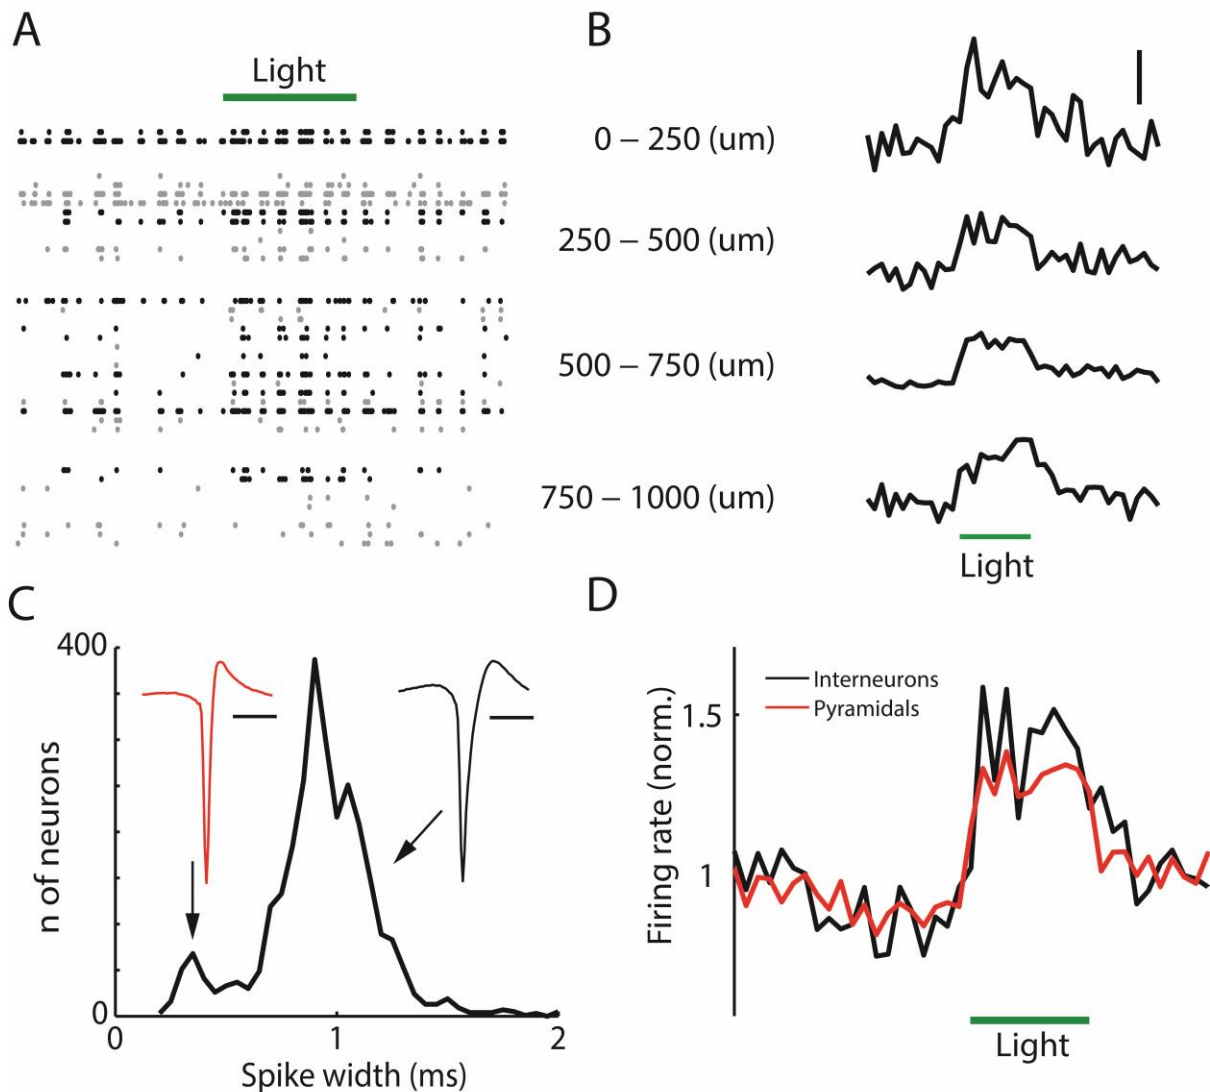

FigS6

1  
 2 **Supplementary Figure 6.** Cortical dynamics by layer and cell-type during optical inhibition of basal  
 3 forebrain somatostatin cells. **A**, example raster plot for all units extracted from a cortical recording  
 4 performed with a 4-shank 32-channel silicon probe. Note most recorded cells are located at  
 5 intermediate depths. Black dots, laser-excited units; gray dots, unresponsive units. (NE83 reg14  
 6 chan1, 212 – 232 seconds) **B**, average normalized discharge probability of cortical neurons activated  
 7 by basal forebrain optogenetic stimulation and recorded by depth. From top to bottom:  $n = 14$  (25.5  
 8 %);  $n = 131$  (30.8 %);  $n = 176$  (28.7 %);  $n = 60$  (31.1 %). Scale bar: 50 % **C**, histogram of spike  
 9 durations (peak-to-trough) for all recorded cortical units ( $n = 2,895$ ). Binsize: 50 us. Note bimodal  
 10 distribution. Insets: average spike waveform for putative interneurons (red trace, width < 0.6 ms,  $n =$   
 11 287, red waveform) and pyramidal cells (black trace, width > 0.6 ms,  $n = 2,588$ , black waveform).  
 12 Scale bar: 1 ms. **D**, average discharge probability for interneurons (black line,  $n = 31$ ) and pyramidal  
 13 cells (red line,  $n = 350$ ) excited by optical stimulation ( $*p < 0.05$ , Wilcoxon signed-rank test).  
 14 Horizontal green lines show laser stimulation (5 s, 15 mW). Bin = 500 ms.  
 15



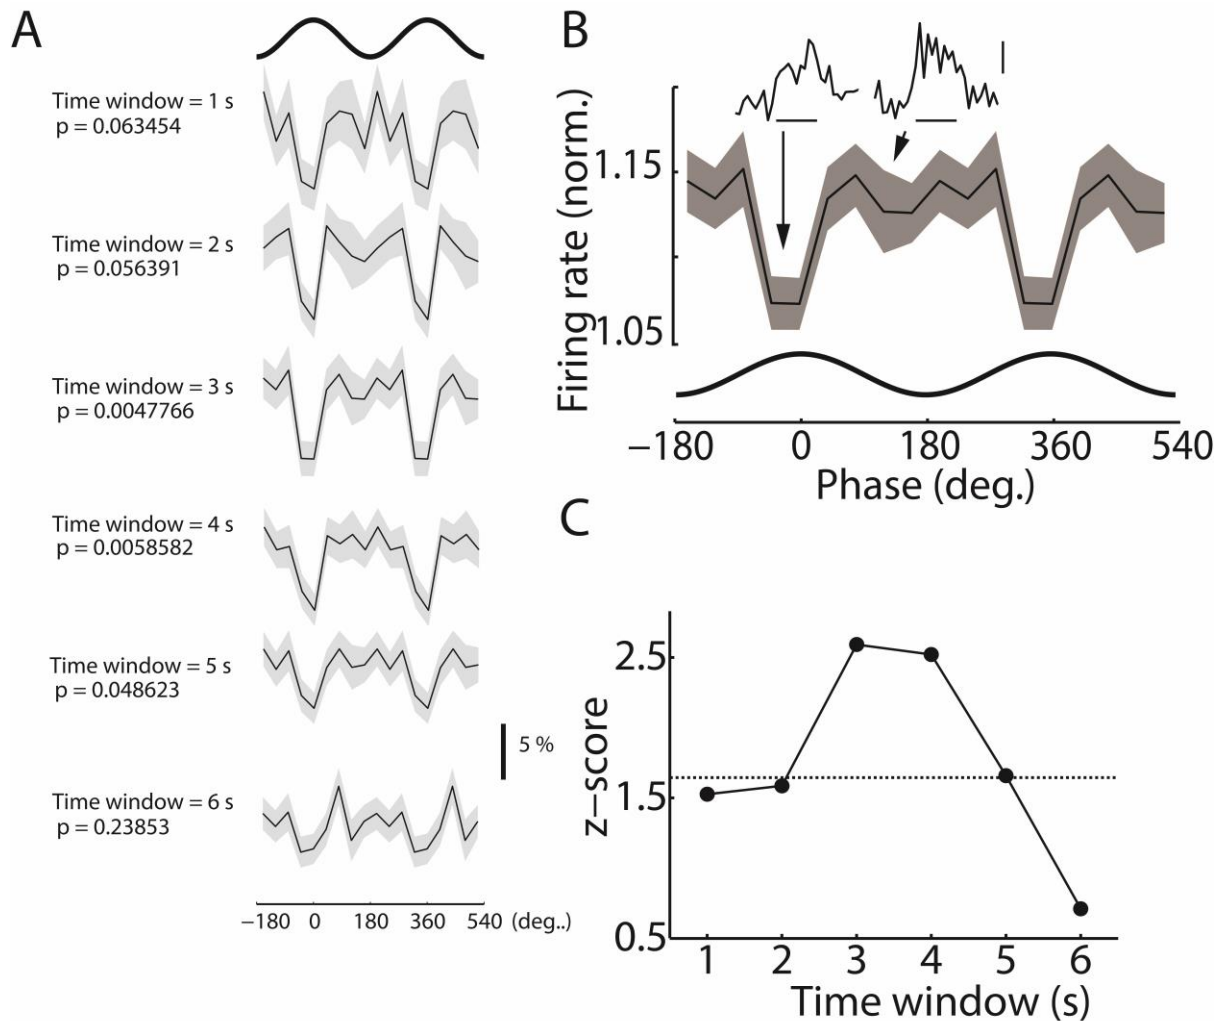

**FigS7**

1  
2 **Supplementary Figure 7.** Phase-modulation of cortical activation during optical inhibition of basal  
3 forebrain somatostatin cells. **A**, phase histograms of average discharge probability induced by laser  
4 stimulation at different time windows. P-value is reported for different time windows starting at the  
5 light onset (circular-linear correlation). Solid line, mean; shaded area, s.e.m. Thick line on top of the  
6 figure represents two cycles of the slow oscillation. Scale bar: 5 %. The same data are repeated in  
7 two cycles for phase histograms to indicate oscillations. The peak of the extracellularly recorded  
8 oscillations in prefrontal cortex was at 0° and 360°. Bin size: 36°. **B**, phase histogram of average  
9 discharge probability induced by light stimulation (circular-linear correlation,  $p = 0.0047$ ). Values  
10 were calculated during the first 3 seconds of the laser pulse. Black line shows mean and shaded area  
11 depicts s.e.m. Sinusoidal bottom line represents two cycles of the slow oscillation. The same data are  
12 repeated in two cycles for phase histograms to indicate oscillations. The peak of the extracellularly  
13 recorded oscillations in prefrontal cortex was at 0° and 360°. Bin size: 40°. Insets: average discharge  
14 probability profile for different phases of cortical slow oscillations. Left, light stimulation during cycle  
15 peaks (around 0 degrees). Right, light stimulation during cycle troughs (around 180 degrees). Note  
16 laser responses during peaks and troughs were significantly different ( $* p < 0.05$ , Wilcoxon signed-  
17 rank test). Scale bar: horizontal, laser stimulus (5 s); vertical, discharge probability (10 %). **C**,  
18 statistical significance z-score of the phase modulation discharge probability as a function of the  
19 integration time window (measured from laser pulse onset). Dashed line indicates statistical

1 significance at  $p = 0.05$ . Note that differences in phase modulation were only significant during the  
2 second half of the laser pulse.  
3

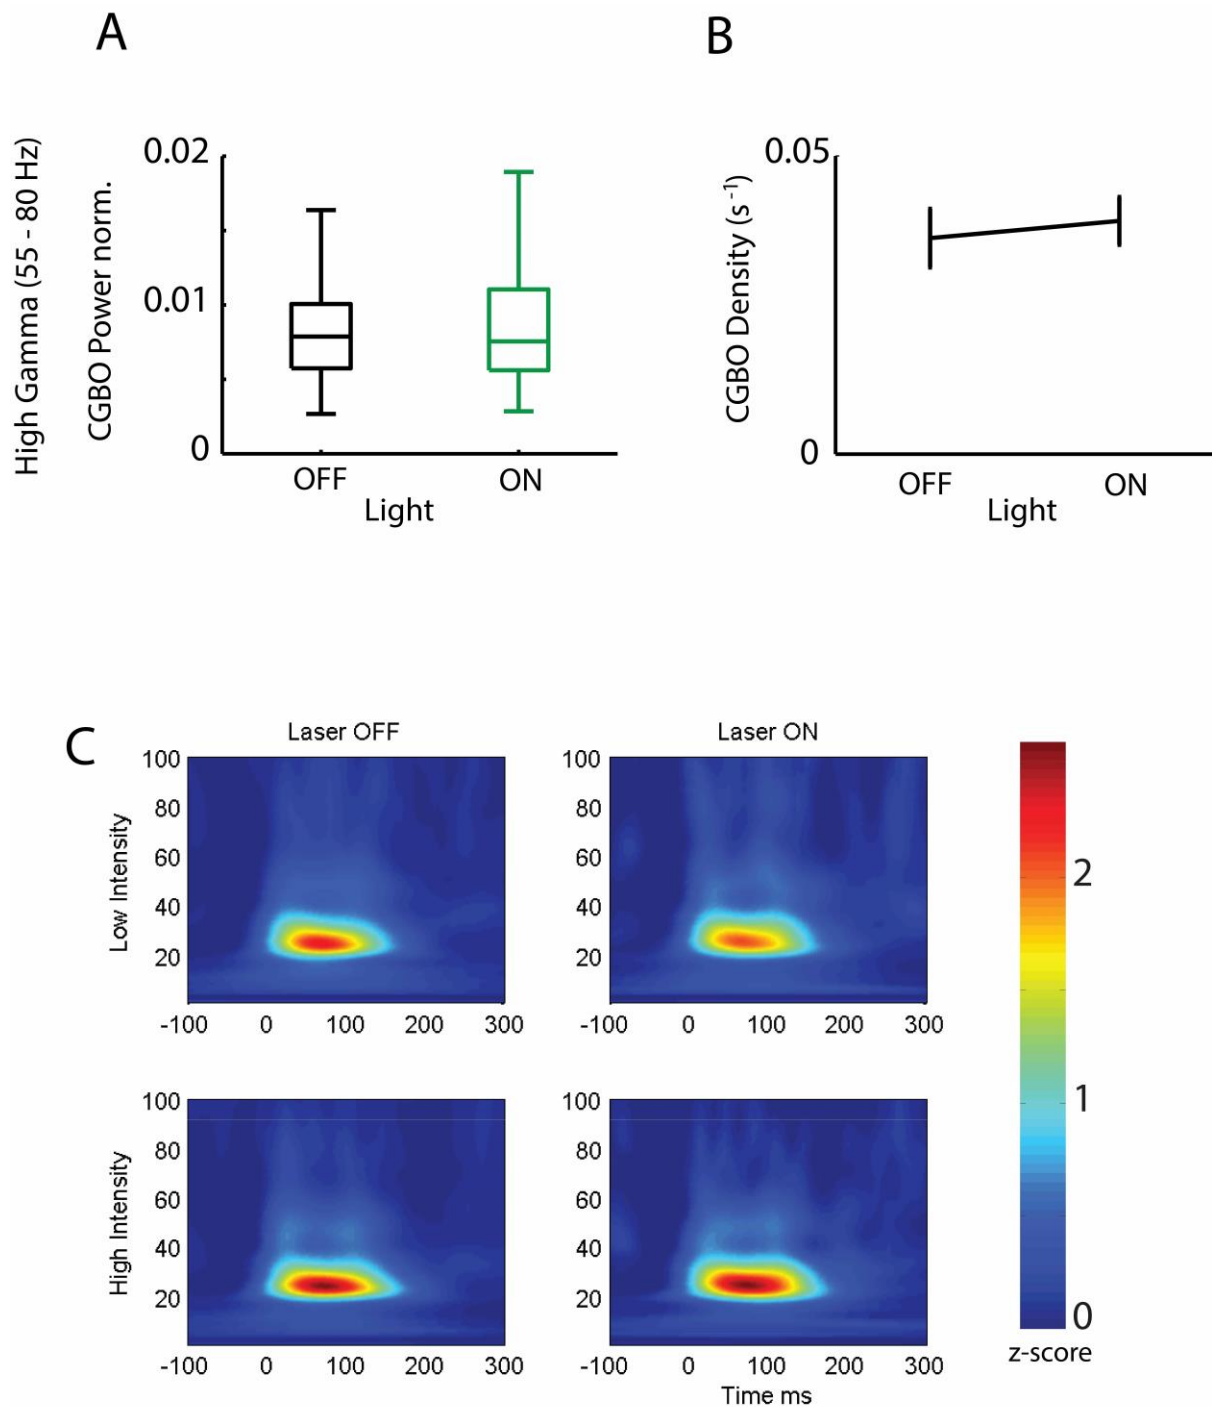

## FIGS8

4 **Supplementary Figure 8.** High gamma activity in the cortex during optical inhibition of basal  
5 forebrain somatostatin cells. **A**, box plots for the average power of high gamma band activity (55-80  
6 Hz,  $p = 0.0520$ ). **B**, plots (mean  $\pm$  s.e.m) of density of high gamma band episodes ( $p = 0.17033$ ). **C**,  
7 time resolved spectrogram of cortical activity for low cortical gamma band events. Basal forebrain  
8 optogenetic stimulation for low (10 mW) and high (15 – 25 mW) light intensities. Neither amplitude  
9

1 nor duration was affected by light intensity. Yet, the mean episode frequency was slightly increased  
2 (supplementary table 1).

3

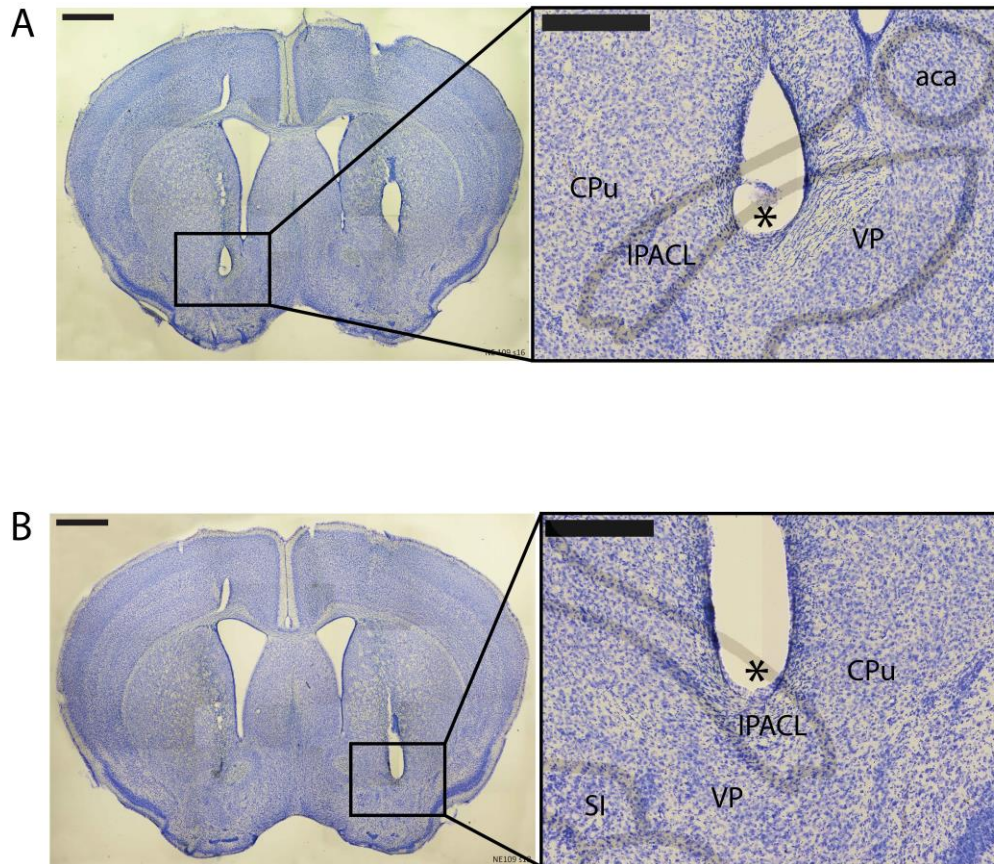

FigS9

4  
5 **Supplementary Figure 9.** Photomontage of Nissl stained brain coronal sections from an example  
6 animal (NE109), showing the track and final tip position (insets) of bilateral optic fibers chronically  
7 implanted for optical stimulation experiments (Figure 4). Note both fibers reached the basal  
8 forebrain. **A**, section 18; **B**, section 16. Insets depict schematic borders of anatomical structures (  
9 adapted from (Franklin and Paxinos, 2007)). Scale bars: thin line: 1 mm, thick line: 400 μm. Asterisks  
10 indicate lesion. CPu, caudate putamen; IPACL: interstitial nucleus of the posterior limb of the  
11 anterior commissure, lateral part; aca: anterior commissure, anterior; VP, ventral pallidum; SI:  
12 substantia innominata.

13

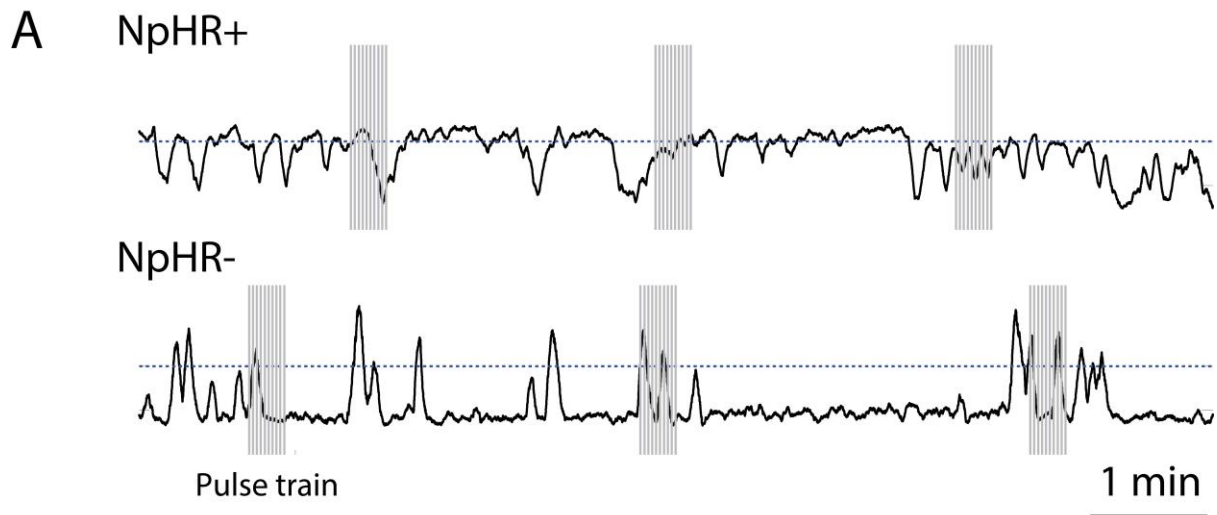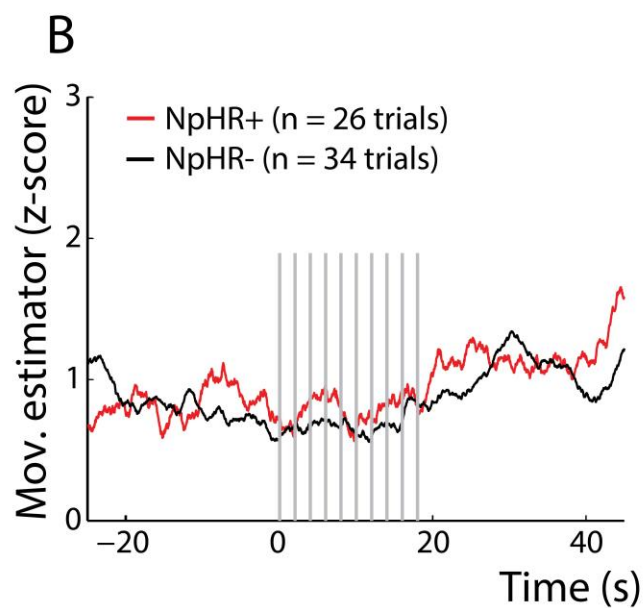

**FigS10**

1 **Supplementary Figure 10.** Locomotor activity upon optogenetic inhibition of basal forebrain  
 2 somatostatin neurons in active mice. **A**, example of movement recorded over time in an NpHR+ (top  
 3 panel) and NpHR- (bottom panel) animal upon laser stimulation of the basal forebrain. **B**, average  
 4 responses of NpHR+ (n = 4) and NpHR- (n = 4) animals to optogenetic inactivation of basal forebrain  
 5 somatostatin cells. Neither latency (p = 0.8) or amplitude (p = 0.22) of the response were  
 6 significantly different between NpHR+ and NpHR- animals (Wilcoxon rank-sum test). Pulse train; 10  
 7 1s pulses at 0.5 Hz, 15-20 mW.

8  
 9  
 10 **Supplementary Table 1.** Parameters of gamma frequency events.

| Gamma oscillations  |               |               | t-test    |
|---------------------|---------------|---------------|-----------|
| Low (20-40 Hz)      | Light off     | Light on      | p - value |
| Duration (ms)       | 156.44 ± 0.63 | 158.98 ± 1.42 | 0.0807    |
| Amplitude (z-score) | 1.44 ± 0.03   | 1.53 ± 0.05   | 0.0536    |
| Frequency (Hz)      | 28.19 ± 0.10  | 28.65 ± 0.12  | 4.94E-04  |
|                     |               |               |           |

|                            |               |               |        |
|----------------------------|---------------|---------------|--------|
| <b>High (55-80 Hz)</b>     |               |               |        |
| <b>Duration (ms)</b>       | 161.74 + 2.62 | 160.80 + 2.92 | 0.7739 |
| <b>Amplitude (z-score)</b> | 2.14 + 0.06   | 2.09 + 0.09   | 0.6298 |
| <b>Frequency (Hz)</b>      | 68.19 + 0.42  | 68.96 + 0.65  | 0.2218 |

1  
2  
3  
4  
5  
6  
7  
8  
9  
10  
11  
12  
13  
14  
15

**Supplementary Movie 1.** (1337\_ON\_LD.avi) Example of behavioral effect induced by the optogenetic stimulation of the basal forebrain in a resting NpHR+ mouse in the open field.

**Supplementary Movie 2.** (1337\_OFF\_LD.avi) Example of behavioral effect induced by the optogenetic stimulation of the basal forebrain in a resting NpHR+ mouse in the open field with the light path blocked.

**Supplementary Movie 3.** (1289\_CRE\_LD.avi) Example of behavioral effect induced by the optogenetic stimulation of the basal forebrain in a resting NpHR- mouse in the open field.
